# Supplementary material for: Use of gamification strategies and tactics in mobile applications for smoking cessation: a review of the UK mobile app market
Source: PubMed Central journal article supplement — BMJ Open. 2019 Jun 17;9(6):e027883. doi: 10.1136/bmjopen-2018-027883 (PMC6596969; doi:10.1136/bmjopen-2018-027883), 2019-06-17
Supplement: bmjopen-2018-027883.draft_revisions.pdf [file bmjopen-2018-027883.draft_revisions.pdf]

# BMJ Open

BMJ Open is committed to open peer review. As part of this commitment we make the peer review history of every article we publish publicly available.

When an article is published we post the peer reviewers' comments and the authors' responses online. We also post the versions of the paper that were used during peer review. These are the versions that the peer review comments apply to.

The versions of the paper that follow are the versions that were submitted during the peer review process. They are not the versions of record or the final published versions. They should not be cited or distributed as the published version of this manuscript.

BMJ Open is an open access journal and the full, final, typeset and author-corrected version of record of the manuscript is available on our site with no access controls, subscription charges or pay-per-view fees (<http://bmjopen.bmj.com>).

If you have any questions on BMJ Open's open peer review process please email [info.bmjopen@bmj.com](mailto:info.bmjopen@bmj.com)

# BMJ Open

## **Gamification in mobile applications for smoking cessation in the United Kingdom: a review.**

|                               |                                                                                                                                                                                                                                                                                                                                                                                                                   |
|-------------------------------|-------------------------------------------------------------------------------------------------------------------------------------------------------------------------------------------------------------------------------------------------------------------------------------------------------------------------------------------------------------------------------------------------------------------|
| Journal:                      | <i>BMJ Open</i>                                                                                                                                                                                                                                                                                                                                                                                                   |
| Manuscript ID                 | bmjopen-2018-027883                                                                                                                                                                                                                                                                                                                                                                                               |
| Article Type:                 | Research                                                                                                                                                                                                                                                                                                                                                                                                          |
| Date Submitted by the Author: | 13-Nov-2018                                                                                                                                                                                                                                                                                                                                                                                                       |
| Complete List of Authors:     | Rajani, Nikita; Imperial College London School of Public Health, Department of Primary care and Public Health<br>Weth, Dominik; MSU Consulting GmbH, Department of Strategy and Innovation<br>Mastellos , Nikolaos; Imperial College London, Department of Primary Care and Public Health<br>Filippidis, Filippos; Imperial College London, Department of Primary Care and Public Health, School of Public Health |
| Keywords:                     | Smoking cessation, Gamification, Mobile applications, mHealth                                                                                                                                                                                                                                                                                                                                                     |
|                               |                                                                                                                                                                                                                                                                                                                                                                                                                   |

SCHOLARONE™  
Manuscripts

1  
2  
3  
4 Gamification in mobile applications for smoking cessation in the  
5 United Kingdom: a review.  
6  
7  
8  
9  
10

11 Nikita B. Rajani<sup>1</sup>, Dominik Weth<sup>2</sup>, Nikolaos Mastellos<sup>1</sup>, Filippos T. Filippidis<sup>1</sup>  
12  
13  
14

15  
16 <sup>1</sup> Department of Primary Care and Public Health, School of Public Health, Imperial College  
17 London, United Kingdom  
18  
19

20  
21 <sup>2</sup> Department of Strategy and Innovation, MSU Consulting GmbH, Bad Homburg, Germany  
22  
23  
24  
25  
26  
27  
28  
29

30 **Corresponding author:**  
31

32 Nikita B. Rajani  
33

34 Address: School of Public Health, Imperial College London, Reynolds Building, St.  
35

36 Dunstan's Road, London W6 8RP, United Kingdom  
37  
38

39 Email: [nikita.rajani14@imperial.ac.uk](mailto:nikita.rajani14@imperial.ac.uk)  
40

41 Telephone: +447427615928  
42  
43  
44  
45  
46  
47  
48  
49  
50  
51  
52  
53  
54  
55  
56  
57  
58  
59

60 **Word count:** 2, 896

## ABSTRACT

**Objective:** Mobile phone-based interventions have been proven to be effective tools for smoking cessation, at least in the short term. Gamification has been associated with increased engagement and motivation, critical success factors for long-term success of mHealth solutions. However, to date no review has examined the use of gamification in smoking cessation mobile apps. Our review aims to examine and quantify the use of gamification strategies and tactics among existing mobile apps for smoking cessation.

**Methods:** The United Kingdom Android and iOS markets were searched in February 2018 to identify smoking cessation apps. 125 Android and 15 iOS apps were tested independently by two reviewers for primary functionalities, and the adoption of gamification strategies and tactics adapted from Cugelman's framework. Pearson chi square tests were run to examine differences between platforms.

**Results:** The most common feature of mobile apps for smoking cessation allowed users to track the days since and/or until the user's quit date (86.4%). The most popular gamification strategy across both platforms was performance feedback (91.4%) and the least common was fun and playfulness (7.9%). More than half of mobile apps adopted a medium level of gamification strategies (55.0%) and tactics (64.3%). Only a minority adopted a high level of gamification strategies (6.4%) or tactics (5.0%).

**Conclusion:** The findings of this review show that a high level of gamification is adopted by a small minority of smoking cessation apps. Further adoption of gamification by mobile app developers, behaviour change researchers and tobacco control policy makers may improve mHealth solutions to smoking cessation.

**Keywords:** Smoking cessation, gamification, mobile applications, mHealth

## STRENGTHS AND LIMITATIONS OF THIS STUDY

- The study had a sample of 140 mobile apps for smoking cessation in the United Kingdom iOS and Google Play store, a market which has been sparsely investigated by past studies.
- Since the framework used to operationalise gamification was developed through review of taxonomies from both academic and non-academic sources, the framework is representative of existing literature.
- The exclusion of apps with less than a 4-star rating or fewer than 5 ratings resulted in the omission of a large number of iOS apps, limiting the generalizability of the findings for the iOS store.
- Certain app functionalities and gamification elements that are only visible or activated upon long-term use may not have been identified by our review.

## INTRODUCTION

Smoking is responsible for 16% of all deaths in the United Kingdom (UK) and remains one of the major preventable causes of chronic diseases.[1] According to a recent study, smoking is ranked as the number one risk factor driving death and disability within the UK.[2] Although behavioural support along with pharmacological treatments is evidently the most effective method for smoking cessation, not all individuals seeking to quit are able or willing to seek face-to-face support.[3] The number of individuals using smoking cessation services provided by the National Health Service in the UK is continuously falling,[4] a trend observed in multiple European countries.[5] The decline in use of stop smoking services is likely to be attributed to access issues in light of significant public health budget cuts.[6] On the other hand, due to increased digitalisation and diffusion of technologies, internet and mobile-based interventions are becoming more popular. The use of mobile-delivered support can be initiated independently by smokers, eliminating the need to seek face-to-face support. With their wide reach and low cost of dissemination, mobile health (mHealth) solutions represent a cost-effective method of helping people quit smoking.[7]

mHealth interventions have been identified as useful tools for aiding smoking cessation. A Cochrane review found that mobile-phone based cessation interventions had a beneficial impact on six-month cessation outcomes.[8] The systematic review concluded that smokers who received support from mobile-phone based interventions were 1.7 times more likely to quit in the short-term compared to those who did not receive the mobile-phone based intervention.[8] Although several mobile apps for smoking cessation exist, many suffer from low engagement and retention levels. According to Singh & Bates (2016), attaining high levels of user engagement is critical for the success of mHealth which is why it is an important focus of mHealth solutions.[9]

1  
2  
3 The application of gamification, the “use of game-design elements in a non-game context”, [10]  
4  
5 in the field of mHealth is rapidly emerging, with mobile app developers increasingly integrating  
6  
7 badges and other elements of gamification to motivate and engage users. There is no shortage  
8  
9 of gamification advocates, particularly in the context of health behaviour change and mHealth.  
10  
11 Some examples of mHealth apps which use gamification include *Zombies, Run!* to increase  
12  
13 physical activity, *SPARX* for battling depression, *Mango Health* for improving retention of  
14  
15 medication use, and *FitGame* to increase intake of fruits and vegetables. According to a  
16  
17 randomised controlled trial, individuals who had access to a gamified version of a web-based  
18  
19 intervention to aid arthritis patients, had a higher level of engagement than those offered the  
20  
21 intervention without game elements.[11] Similarly, a study found that participants who utilised  
22  
23 a gamified smoking cessation intervention had higher levels of motivation and engagement  
24  
25 compared to a non-gamified cohort.[12] Gamification has also been associated positively with  
26  
27 self-efficacy and psychological empowerment, among other behavioural and psychological  
28  
29 outcomes.[11, 13-15]  
30  
31  
32  
33  
34  
35

36 Despite the increased application of gamification in the mHealth industry and the promising  
37  
38 findings of its benefits for health behaviour change, little research has examined the use of  
39  
40 gamification in the context of mHealth and smoking cessation. Although some reviews on  
41  
42 mobile apps for smoking cessation have been conducted,[16-20] none explored the application  
43  
44 and adoption of gamification. Moreover, existing reviews are outdated and sparsely focus on  
45  
46 the UK mobile app market. Since the mobile app market is constantly evolving, it is important  
47  
48 that a more up-to-date review is conducted to gain insight on the currently available mobile  
49  
50 apps for smokers seeking to quit. Our study investigated mobile apps for smoking cessation  
51  
52 currently available in the UK to gain insight on the types of apps available and their  
53  
54 functionalities. Moreover, we examined the types of gamification elements and the level of  
55  
56 gamification implemented in the mobile apps. The findings of our research can have important  
57  
58  
59  
60

1  
2  
3 implications for smokers seeking to quit via mHealth, mobile app developers and tobacco policy  
4  
5 makers.  
6  
7

## 8 **METHODS**

### 9 **Sample and Procedure**

10  
11  
12  
13 The methodology of the mobile app review included three stages: identification, screening and  
14 testing. To identify mobile apps available on both Android and iOS platforms in the UK, the  
15 software 42matters was used.[21] Data on App market Application Programming Interface  
16 (API) were extracted using the software on February 19<sup>th</sup> 2018 using search terms consistent  
17 with prior mobile app reviews: “stop smoking” “quit smoking” and “smoking cessation”. [16-  
18  
19  
20  
21  
22  
23  
24  
25  
26  
27  
28  
29  
30  
31  
32  
33  
34  
35  
36  
37  
38  
39  
40  
41  
42  
43  
44  
45  
46  
47  
48  
49  
50  
51  
52  
53  
54  
55  
56  
57  
58  
59  
60  
20]

Apps were then screened independently by two researchers. Apps with duplicate identification numbers were eliminated. Moreover, apps with no rating, a rating of less than four (out of five) or fewer than five individual ratings were eliminated. The cut-off point of five individual ratings is already set forth by the Apple Store. In order to treat apps from both stores equally, we applied the same cut-off point to Android apps. Whilst the methodology used by Android and Apple stores to rank apps is not transparent, it is accepted that the rating, number of ratings, downloads and reviews can be used to determine an app’s popularity. Using popularity as an inclusion or exclusion criterion for mobile app reviews is a common methodology adopted in past studies as it ensures that the most widely used and most ‘liked’ apps are evaluated.[22-24]

Once preliminary criteria had been applied, the remaining apps were screened based on the description and screenshots of mobile apps provided on their main page in the store. The information was used to apply the following exclusion criteria: primary aim was not to help smokers quit; app was not in the English language; app was irrelevant; app focused on hypnosis; and app targeted specific patient groups or healthcare professionals. Further exclusions were conducted upon installation of mobile apps. Additional exclusion criteria upon installation



1  
2  
3 included: unsuccessful download of the app; software problems upon installation; and  
4  
5 requirement for additional devices such as smartwatches. After screening was complete, a total  
6  
7 of 140 mobile apps remained of which 125 were Android apps and 15 were iOS apps. The  
8  
9 procedure inclusive of the number of apps excluded in each stage of the methodology can be  
10  
11 seen in figure 1.  
12  
13

14  
15 [Insert Figure 1]  
16  
17

## 18 **Coding and Classification of Mobile Apps**

19  
20  
21 After screening procedures, two reviewers independently tested each app. Every app was  
22  
23 installed and reviewed for approximately 30 minutes on the day of installation. The next day,  
24  
25 each mobile app was reviewed for the delivery of any additional notifications. Similar to  
26  
27 screening, discrepancies not resolved by the two reviewers, led to a consultation and final  
28  
29 decision from a third reviewer.  
30  
31

### 32 *General Functionalities*

33  
34  
35  
36 Functionalities of apps were coded based on categories consistently used by previous mobile  
37  
38 app reviews on smoking cessation.[17-19] The categories included: (1) Tracker: the app tracks  
39  
40 the number of days elapsed since the user quit smoking and/or the number of days until the  
41  
42 user's quit date; (2) Calculator: the app primarily calculates the amount of money a smoker  
43  
44 saves by not smoking and/or the health benefits attained by abstaining; (3) Rationing: the app  
45  
46 prompts the user to limit the number of cigarettes smoked and/or how often the user can smoke  
47  
48 a cigarette (e.g. providing time limits); (4) Informational: app provides information in the form  
49  
50 of text and images to provide the user with knowledge on various aspects of smoking cessation;  
51  
52 (5) Game: app takes the form of a game to help users quit; (6) Lung Health Monitor: app  
53  
54 measures and tracks the user's lung function and health; and (7) Other: all functionalities that  
55  
56 did not fit one of the six other categories.  
57  
58  
59  
60

## *Gamification*

To assess gamification, a framework developed by Cugelman (2013) was used.[25] The framework consists of two parts: (1) the persuasive architecture of gamification, also known as the broad principles or strategies of gamification, and (2) the on-screen features of gamification that users interact with, also known as gamification tactics. Cugelman (2013) developed this framework through a review of a number of other taxonomies presented both in academic and non-academic sources.[25] A large amount of overlap existed when compared to other frameworks; Cugelman (2013) captured the active ingredients of gamification as represented in the literature. The framework which was used to operationalise gamification can be seen in figure 2.

[Insert Figure 2]

## **Data Analysis**

To examine the price, ratings and features of mobile apps descriptive statistics were calculated. We classified the level of gamification strategies as none; low (1-2 strategies); medium (3-5 strategies); and high (6-7 strategies). Similarly, we classified the level of gamification tactics as none; low (1-3 tactics); medium (4-7 tactics); and high (8-10 tactics). In order to investigate any differences between the two mobile platforms, we used Pearson chi-square tests for independence. For instances when the frequency count was less than 5, we used Fisher's exact test of independence. A significance level of  $p < 0.05$  was set to determine statistical significance. All statistical analyses were conducted using STATA 12.1.

## **Patient and Public Involvement**

The study had no patient or public involvement.

## RESULTS

### App functionalities

Table 1 presents the general characteristics of mobile apps for smoking cessation across both platforms. The most common feature amongst apps across both platforms was the tracker feature which allows users to track the day until and/or since quitting (86.4%). A large majority of apps included a calculator feature which helps users calculate money saved or health benefits accrued since quitting (80.3%). Only 15.7% of apps across both platforms were informational, and only a small number were games or included games to help smokers quit (11.4%). Across both platforms, the majority of apps tested were free (85.0%) and the average user rating across was 4.4 since apps with less than a 4-star rating were excluded.

Table 1. Overview of mobile apps for smoking cessation

|                  |                        | Platform         |                    |                        |
|------------------|------------------------|------------------|--------------------|------------------------|
|                  |                        | iOS (n=15)       | Android (n=125)    | Both Platforms (n=140) |
| Features of Apps | Calculator             | 15 (100%)        | 99 (79.2%)         | 114 (80.3%)            |
|                  | Rationing              | 1 (6.7%)         | 24 (19.2%)         | 25 (17.9%)             |
|                  | Tracker                | 15 (100%)        | 106 (84.8%)        | 121 (86.4%)            |
|                  | Informational          | 4 (26.7%)        | 18 (14.4%)         | 22 (15.7%)             |
|                  | Game                   | 0 (0%)           | 16 (12.8%)         | 16 (11.4%)             |
|                  | Lung Health Monitor    | 0 (0%)           | 0 (0%)             | 0 (0%)                 |
|                  | Other                  | 1 (6.7%)         | 4 (3.2%)           | 5 (3.6%)               |
| Cost             | Free                   | 14 (93.3%)       | 105 (84.0%)        | 119 (85.0%)            |
|                  | Paid                   | 1 (6.7%)         | 20 (16.0%)         | 21 (15.0%)             |
|                  | Mean Price (£)         | 1.0 (0.0 – 0.99) | 2.2 (0.0 – 8.6)    | 2.1 (0.0 – 8.6)        |
| Popularity       | Mean User Rating       | 4.6 (4.1 – 5.0)  | 4.4 (4.0 – 5.0)    | 4.4 (4.0 – 5.0)        |
|                  | Mean Number of Ratings | 821 (6 – 6,500)  | 1,726 (6 – 35,045) | 1,629 (6 – 35,045)     |

### Gamification

An overview of the number and percentage of each gamification strategy and tactic adopted by mobile apps is presented in table 2. The most popular gamification strategy across both platforms was feedback on performance (91.4%). A majority of the apps allowed users to track their smoking habits or calculate money and health benefits, hence this gamification strategy

was inherently present. Although almost two thirds of mobile apps across both platforms (64.3%) utilised goal setting to motivate users, only 28.6% of apps provided users with the capacity and support to reach the goals set and the challenges faced. For example, “Smoking Log – Stop Smoking” is an example of an app which was reviewed that enabled the user to set goals with regard to the number of cigarettes the user can smoke that day or the time until the next cigarette can be smoked, but it provides no support or advice to the user on how this goal can be achieved.[26]

Additionally, almost half of the mobile apps across both platforms adopted social connectivity (49.3%). However, most of these achieved this by including share options with popular social media platforms. Only a few of the apps provided users with social communities integrated into the app itself to share thoughts or discuss progress with other smokers trying to quit. Finally, the least common gamification strategy observed in the apps was fun and playfulness (7.9%). This finding is consistent with the low presence of on-screen gamification tactics, such as showing game leaders (4.3%) and including a theme or story within the app (4.3%). No statistically significant differences between the two platforms were found for any of the gamification strategies or tactics (p-value>0.05).

Table 2. Number of gamification principles and strategies

|                         |                                 | Platform    |                 |              | Chi-Square |
|-------------------------|---------------------------------|-------------|-----------------|--------------|------------|
|                         |                                 | iOS (n=15)  | Android (n=125) | Both (n=140) | P-Value    |
| Gamification Strategies | Goal setting                    | 10 (66.7%)  | 80 (64.0%)      | 90 (64.3%)   | 0.839      |
|                         | Capacity of overcome challenges | 7 (46.7%)   | 33 (26.4%)      | 40 (28.6%)   | 0.101      |
|                         | Feedback on performance         | 15 (100.0%) | 113 (90.4%)     | 128 (91.4%)  | 0.363      |
|                         | Reinforcement                   | 10 (66.7%)  | 61 (48.8%)      | 71 (50.7%)   | 0.191      |
|                         | Compare progress                | 4 (26.7%)   | 17 (13.6%)      | 21 (15.0%)   | 0.242      |
|                         | Social connectivity             | 9 (60.0%)   | 60 (48.0%)      | 69 (49.3%)   | 0.380      |
|                         | Fun and playfulness             | 1 (6.7%)    | 10 (8.0%)       | 11 (7.9 %)   | 1.000      |
|                         | Provides clear goals            | 10 (66.7%)  | 80 (64.0%)      | 90 (64.3%)   | 0.839      |
|                         | Offers a challenge              | 10 (66.7%)  | 80 (64.0%)      | 90 (64.3%)   | 0.839      |
|                         | Uses levels                     | 3 (20.0%)   | 25 (20.0%)      | 28 (20.0%)   | 1.000      |
|                         | Allocates points                | 1 (6.7%)    | 9 (7.2%)        | 10 (7.1%)    | 1.000      |

|                      |                                  |             |             |             |       |
|----------------------|----------------------------------|-------------|-------------|-------------|-------|
| Gamification Tactics | Shows progress                   | 15 (100.0%) | 113 (90.4%) | 128 (91.4%) | 0.363 |
|                      | Provides feedback                | 15 (100.0%) | 113 (90.4%) | 128 (91.4%) | 0.363 |
|                      | Gives rewards                    | 10 (66.7%)  | 61 (48.8%)  | 71 (50.7%)  | 0.191 |
|                      | Provides badges for achievements | 9 (60.0%)   | 49 (39.2%)  | 58 (41.4%)  | 0.122 |
|                      | Shows game leaders               | 1 (6.7%)    | 5 (4.0%)    | 6 (4.3%)    | 0.500 |
|                      | Gives a story/theme              | 1 (6.7%)    | 5 (4.0%)    | 6 (4.3%)    | 0.500 |

\*P-value < 0.05

Table 3 presents the level of gamification adopted by mobile apps, in terms of the number of strategies and the number of on-screen features (also known as gamification tactics). Only 7.1% of apps across platforms did not adopt any gamification strategy or tactic. More than half of mobile apps across both platforms had adopted a medium level of gamification strategies (55.0%) and tactics (64.3%). However, only a minority adopted a high level of gamification strategies (6.4%) or a high level of gamification tactics (5.0%). No statistically significant differences between the two platforms were found with relation to the level of gamification strategies or tactics (p-value>0.05).

Table 3. Level of gamification incorporated in mobile apps for smoking cessation.

|                                           |              | Platform   |                 |                        | Chi-Square |
|-------------------------------------------|--------------|------------|-----------------|------------------------|------------|
|                                           |              | iOS (n=15) | Android (n=125) | Both Platforms (n=140) | P-Value    |
| Number of gamification strategies adopted | 0 (None)     | 0 (0.0%)   | 10 (8.0%)       | 10 (7.1%)              | 0.600      |
|                                           | 1-2 (Low)    | 4 (26.7%)  | 40 (32.0%)      | 44 (31.4%)             | 0.776      |
|                                           | 3-5 (Medium) | 9 (60%)    | 68 (54.4%)      | 77 (55.0%)             | 0.700      |
|                                           | 6-7 (High)   | 2 (13.3%)  | 7 (5.6%)        | 9 (6.4%)               | 0.248      |
| Number of gamification tactics adopted    | 0 (None)     | 0 (0.0%)   | 10 (8.0%)       | 10 (7.1%)              | 0.600      |
|                                           | 1-3 (Low)    | 4 (26.7%)  | 29 (23.2%)      | 33 (23.6%)             | 0.753      |
|                                           | 4-7 (Medium) | 9 (60.0%)  | 81 (64.8%)      | 90 (64.3%)             | 0.714      |
|                                           | 8-10 (High)  | 2 (13.3%)  | 5 (4.0%)        | 7 (5.0%)               | 0.164      |

\*P-value < 0.05

## DISCUSSION

We reviewed mobile apps for smoking cessation available in the UK Android and iOS app stores and found that most of them incorporated a limited number of gamification elements and strategies.

1  
2  
3 We found that a majority of apps tested in our review allowed users to calculate the money  
4 saved or health benefits accrued since quitting. The popularity of this feature amongst mobile  
5 apps for smoking cessation is consistent with prior reviews.[17-20] A large proportion of  
6 smoking cessation apps available on the UK market also allow users to track the day until and  
7 or since quitting. The integration of tracker and calculator features permits users to self-monitor  
8 their progress, a technique which has been associated with increased effectiveness for health  
9 behaviour change.[27-28]  
10  
11  
12  
13  
14  
15  
16  
17  
18  
19

20 Across both platforms the most common gamification strategy adopted was feedback on  
21 performance, whereas the least common gamification strategy was fun and playfulness. Fun  
22 and playfulness require app developers to include on-screen features such as a story or theme  
23 for the entertainment and liking of the user. However, most apps do not incorporate such  
24 elements likely because they are more difficult to implement in comparison to basic tracker and  
25 calculator features which inherently provide feedback on performance. Goal setting was present  
26 in more than 60% of apps. This is promising as past research suggests that goal setting is a  
27 fundamental component for successful health behaviour change interventions.[29] Although  
28 several apps allow users to set goals, not many provide advice or information on how to set  
29 realistic and appropriate goals, or how to achieve them.  
30  
31  
32  
33  
34  
35  
36  
37  
38  
39  
40  
41  
42

43 Nearly half of the apps implement social connectivity as a gamification strategy. However, most  
44 do so by providing basic and easily implementable options of sharing results and progress to  
45 others via popular social media platforms rather than setting up social communities where  
46 thoughts and progress can be discussed with other smokers attempting to quit. Online social  
47 communities provide a platform for additional support, as well as a channel to interact with  
48 others seeking to quit. This could potentially increase awareness of and user engagement with  
49 the app to improve cessation rates.  
50  
51  
52  
53  
54  
55  
56  
57  
58  
59  
60

1  
2  
3 Regarding the level of gamification, our results indicate that a majority of apps adopt a medium  
4 level of gamification strategies and/or tactics, with few adopting no gamification or a high level  
5 of gamification. Several gamification elements are inherently present in mobile apps which may  
6 be misleading regarding the true extent of gamified design in smoking cessation apps. Several  
7 gamification elements such as providing feedback and showing progress are inherently present  
8 even in mobile apps that would not be generally perceived as gamified, such as Google Maps  
9 and Instagram. Therefore, existing literature and our analysis may overestimate the level of  
10 gamification truly present. Refining gamification taxonomies to better measure the true level of  
11 gamification would allow researchers to look beyond elements inherently found in mobile apps.  
12  
13  
14  
15  
16  
17  
18  
19  
20  
21  
22  
23

24 Despite the possible overestimation of the level of gamification in mobile apps, research shows  
25 that gamification can positively impact psychological and behavioural outcomes.[11-15]  
26 Consequently, mobile apps for smoking cessation which adopt a high level of gamification  
27 could provide a potentially cost-effective method for higher smoking cessation rates, thereby  
28 achieving a substantial public health impact. By addressing issues of engagement and retention  
29 of mHealth solutions through the application of gamification, gamified mHealth interventions  
30 could be an effective method of improving cessation rates with wide-reach and low costs of  
31 dissemination. Past research has shown the benefits of mobile and internet-based interventions  
32 for individuals of lower socioeconomic status;[30-31] hence the provision of effective mobile  
33 apps for smoking cessation could reduce health inequalities by increasing cessation rates  
34 amongst disadvantaged groups. However, the development of gamified mobile apps for  
35 smoking cessation requires collaboration between gaming experts, software developers,  
36 behaviour change specialists and tobacco control policy makers. Further research needs to  
37 continue to investigate gamified mobile apps for smoking cessation in randomised controlled  
38 trials to assess effectiveness on quit rates, as well as the potential benefits.  
39  
40  
41  
42  
43  
44  
45  
46  
47  
48  
49  
50  
51  
52  
53  
54  
55  
56  
57  
58  
59  
60

1  
2  
3 There are several strengths of our review. The focus on the UK mobile app market, which has  
4 not been extensively studied in past literature, helps gain insight on mobile app interventions  
5 available in this geographic region. Moreover, we tested apps available in two major app stores,  
6 inclusive of apps with a cost. This ensures that our findings are up to date and representative of  
7 the entire UK mobile app market.  
8  
9  
10  
11  
12  
13  
14

15 Our findings are also bound by some limitations. Due to the exclusion criteria, apps with less  
16 than a 4-star rating or apps with fewer than 5 ratings were excluded. This particularly led to the  
17 exclusion of a large number of iOS apps and therefore could have an effect on the  
18 generalizability of the findings. Additionally, since all mobile apps were reviewed for  
19 approximately 30 minutes on the day of installation and a few minutes the next day, it could be  
20 that certain app functionalities that are only visible or activated upon long-term use would not  
21 have been recorded.  
22  
23  
24  
25  
26  
27  
28  
29  
30  
31

## 32 **CONCLUSION**

33 Our research comprehensively reviewed the UK market for smoking cessation mobile  
34 applications in early 2018. Our findings showed that a medium level of gamification is adopted  
35 amongst smoking cessation apps and only a minority adopt a high level of gamification or  
36 incorporate more complex and difficult to implement gamification features. Since gamification  
37 can be used to address critical limitations of mHealth interventions, such as engagement and  
38 retention, our research shows that increased effort and collaboration between gaming experts,  
39 software developers and behaviour change specialists is essential for the development of  
40 gamified mobile apps for smoking cessation.  
41  
42  
43  
44  
45  
46  
47  
48  
49  
50  
51  
52  
53  
54  
55  
56  
57  
58  
59  
60



## DECLARATIONS

**Ethical approval:** Primary data was collected and analysed by the authors from publicly available sources. No participants were involved nor was an intervention administered. No ethical approval was required.

**Consent to Publish:** Not applicable.

**Competing interests:** No competing interests.

**Funding:** This research received no specific grant from any funding agency in the public, commercial or not-for-profit sectors.

**Data Sharing Statement:** All data were extracted from mobile apps available to download on iOS and Google stores. Details of the extracted data are available by the authors upon request.

**Author Contributions:** NR conducted the mobile app review and produced the first draft of the paper. DW acted as a second reviewer and helped consolidate the results of the review. FF and NM provided guidance on the overall methodology of the review and revised the manuscript for content. All authors contributed to the interpretation of results, read and approved the final manuscript.

**Acknowledgements:** Not applicable.

## FIGURE LEGEND

**Figure 1.** Identification, Screening and Testing Stages of the Mobile App Review

**Figure 2.** Gamification Principles and Tactics Framework

## REFERENCES

1. National Health Service [Internet]. Statistics on Smoking – England, 2018 [PAS] 3rd July 2018. Available from: <https://digital.nhs.uk/data-and-information/publications/statistical/statistics-on-smoking/statistics-on-smoking-england-2018/content>
2. healthdata.org [Internet]. Institute for Health Metrics and Evaluation: United Kingdom. 2016. Available from: <http://www.healthdata.org/united-kingdom> (accessed 4 Oct 2018)
3. Stead LF, Koilpillai P, Fanshawe TR, Lancaster T. Combined pharmacotherapy and behavioural interventions for smoking cessation. *Cochrane Database Syst Rev* 2016(3). Available from: <https://www.cochranelibrary.com/cdsr/doi/10.1002/14651858.CD008286.pub3/full> (accessed 5 Oct 2018)
4. Iacobucci, G. Stop smoking services: BMJ analysis show how councils are stubbing them out. *BMJ* 2018; 362:k3649.
5. Filippidis FT, Lavery AA, Mons U, Jimenez-Ruiz C, Vardavas CI. Changes in smoking cessation assistance in the European Union between 2012 and 2017: pharmacotherapy versus counselling versus e-cigarettes. *Tob Control* [Internet] 2018. Available from: <https://tobaccocontrol.bmj.com/content/early/2018/03/21/tobaccocontrol-2017-054117> (accessed 5 Oct)
6. Iacobucci G. Number of people using NHS stop smoking services continues to fall. *BMJ* 2017;358:j3936.
7. World Health Organisation [Internet]. mHealth: Use of appropriate digital technologies for public health. Seventy First World Health Assembly, A71/20. 26<sup>th</sup> March 2018. Available from: [http://apps.who.int/gb/ebwha/pdf\\_files/WHA71/A71\\_20-en.pdf](http://apps.who.int/gb/ebwha/pdf_files/WHA71/A71_20-en.pdf)
8. Whittaker R, McRobbie H, Bullen C, Rodgers A, Gu Y. Mobile phone-based interventions for smoking cessation. *Cochrane Database of Syst Rev* 2016;4:Cd006611.
9. Singh K, Drouin K, Newmark LP, Rozenblum R, Lee J, Landman A, et al. Developing a Framework for Evaluating the Patient Engagement, Quality, and Safety of Mobile Health Applications. *Issue brief (Commonw Fund)* 2016;5:1-11.
10. Deterding S, Dixon D, Khaled R, et al. From game design elements to gamefulness: defining "gamification". Proceedings of the 15th International Academic MindTrek Conference: Envisioning Future Media Environments; Tampere, Finland. 2181040: ACM; 2011. p. 9-15.
11. Allam A, Kostova Z, Nakamoto K, Schulz PJ. The effect of social support features and gamification on a Web-based intervention for rheumatoid arthritis patients: randomized controlled trial. *J. Med Internet Res* 2015;17(1):e14.

12. El-Hilly AA, Iqbal SS, Ahmed M, Sherwani Y, Muntasir M, Siddiqui S, et al. Game On? Smoking Cessation Through the Gamification of mHealth: A Longitudinal Qualitative Study. *JMIR Serious Games* 2016;4(2):e18.
13. Harold DJ. A Qualitative Study on the Effects of Gamification on Student Self-Efficacy. International Society for Technology in Education Conference; Philadelphia 2015.
14. Banfield J, Wilkerson B. Increasing Student Intrinsic Motivation and Self-Efficacy through Gamification Pedagogy. *Contemporary Issues in Education Research*. 2014;7(4):291-8.
15. Johnson D, Deterding S, Kuhn K-A, Staneva A, Stoyanov S, Hides L. Gamification for health and wellbeing: A systematic review of the literature. *Internet Interventions* 2016;6:89-106.
16. Choi J, Noh GY, Park DJ. Smoking cessation apps for smartphones: content analysis with the self-determination theory. *J. of Med Internet Res* 2014;16(2):e44.
17. Abroms LC, Lee Westmaas J, Bontemps-Jones J, Ramani R, Mellerson J. A content analysis of popular smartphone apps for smoking cessation. *Am J Prev Med* 2013;45(6):732-6.
18. Abroms LC, Padmanabhan N, Thaweethai L, Phillips T. iPhone apps for smoking cessation: a content analysis. *Am J Prev Med* 2011;40(3):279-85.
19. Hoepfner BB, Hoepfner SS, Seaboyer L, Schick MR, Wu GW, Bergman BG, et al. How Smart are Smartphone Apps for Smoking Cessation? A Content Analysis. *Nicotine & Tobacco Research* 2016;18(5):1025-31.
20. Bennett ME, Toffey K, Dickerson F, Himelhoch S, Katsafanas E, Savage CLG. A Review of Android Apps for Smoking Cessation. *Journal of Smoking Cessation* 2015;10(2):106-15.
21. App Market API [Internet]. Available from: <https://42matters.com/>.
22. Azar KM, Lesser LI, Laing BY, et al. Mobile applications for weight management: theory-based content analysis. *Am J Prev Med* 2013;45(5):583-9.
23. Breton ER, Fuemmeler BF, Abroms LC. Weight loss—there is an app for that! But does it adhere to evidence-informed practices? *Translational Behavioral Medicine* 2011;1(4):523-9.
24. Cowan LT, Van Wagenen SA, Brown BA, et al. Apps of steel: are exercise apps providing consumers with realistic expectations? A content analysis of exercise apps for presence of behavior change theory. *Health Educ Behav* 2013;40(2):133-9.
25. Cugelman B. Gamification: What It Is and Why It Matters to Digital Health Behaviour Change Developers. *JMIR Serious Games* 2013;1(1): e3.

- 1  
2  
3 26. Charlton C. Smoking Log – Stop Smoking. Google Play Store [Internet] Available from:  
4 <https://play.google.com/store/apps/details?id=com.ccswe.SmokingLog&hl=en> (accessed 26  
5 Feb 2018)  
6  
7  
8 27. Greaves CJ, Sheppard KE, Abraham C, et al. Systematic review of reviews of intervention  
9 components associated with increased effectiveness in dietary and physical activity  
10 interventions. *BMC Public Health* [Internet] 2011; 11:19. Available from:  
11 <https://bmcpublichealth.biomedcentral.com/articles/10.1186/1471-2458-11-119> (accessed 1  
12 Oct 2018)  
13  
14  
15 28. van Achterberg T, Huisman-de Waal GG, Ketelaar NA, Oostendorp RA, Jacobs JE,  
16 Wollersheim HC. How to promote healthy behaviours in patients? An overview of evidence  
17 for behaviour change techniques. *Health Promot Int* 2011;26(2):148-62.  
18  
19  
20 29. Epton T, Currie S, Armitage CJ. Unique effects of setting goals on behavior change:  
21 Systematic review and meta-analysis. *J Consult Clin Psychol* [Internet] 2017;85(12):1182-  
22 1198. Available from: <https://www.ncbi.nlm.nih.gov/pubmed/29189034> (accessed 4 Oct  
23 2018)  
24  
25  
26 30. Hiscock R, Bauld L, Amos A, Platt S. Smoking and socioeconomic status in England: the  
27 rise of the never smoker and the disadvantaged smoker. *J Public Health (Oxf)*  
28 2012;34(3):390-6.  
29  
30  
31 31. Hiscock R, Dobbie F, Bauld L. Smoking Cessation and Socioeconomic Status: An Update  
32 of Existing Evidence from a National Evaluation of English Stop Smoking Services. *BioMed*  
33 *Res Int* 2015;1-10.  
34  
35  
36  
37  
38  
39  
40  
41  
42  
43  
44  
45  
46  
47  
48  
49  
50  
51  
52  
53  
54  
55  
56  
57  
58  
59  
60

1  
2  
3  
4  
5  
6  
7  
8  
9  
10  
11  
12  
13  
14  
15  
16  
17  
18  
19  
20  
21  
22  
23  
24  
25  
26  
27  
28  
29  
30  
31  
32  
33  
34  
35  
36  
37  
38  
39  
40  
41  
42  
43  
44  
45  
46  
47  
48  
49  
50  
51  
52  
53  
54  
55  
56  
57  
58  
59  
60

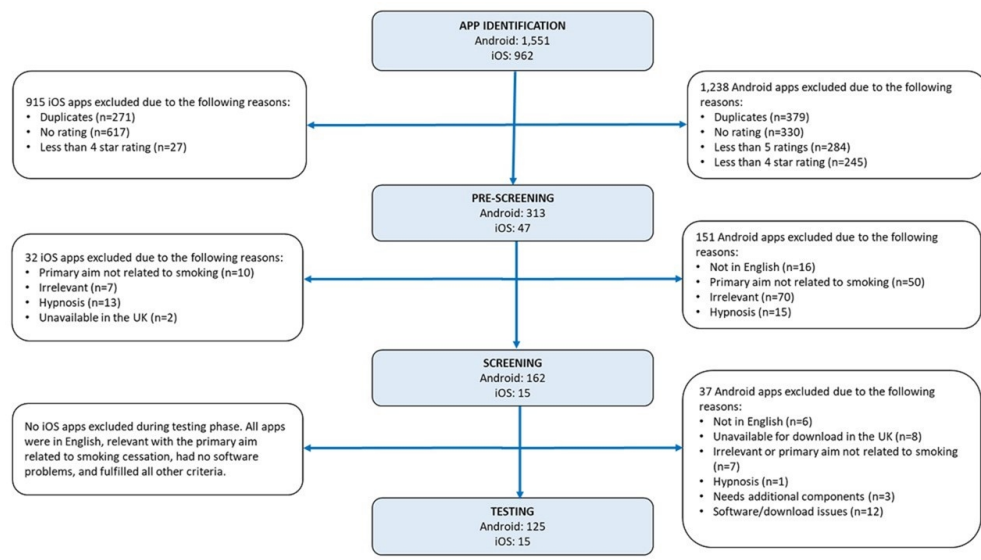

Figure 1. Identification, Screening and Testing Stages

108x60mm (300 x 300 DPI)

#### Gamification Principles

1. Goal setting: Committing to achieve a goal
2. Capacity to overcome challenges: Growth, learning and development
3. Provide feedback on performance: Receiving constant feedback through the experience
4. Reinforcement: Gaining rewards, avoid punishments
5. Compare progress: Monitoring progress with self and others
6. Social connectivity: Interacting with other people
7. Fun and playfulness: Paying out an alternative reality

#### Gamification Tactics

1. Providing clear goals
2. Offering a challenge
3. Using levels or incremental challenges
4. Allocating points
5. Showing progress
6. Providing feedback
7. Giving rewards
8. Providing badges for achievements
9. Showing the game leaders
10. Giving a story or theme

#### Gamification Principles and Tactics Framework

54x41mm (300 x 300 DPI)

# BMJ Open

## Use of gamification strategies and tactics in mobile applications for smoking cessation: a review of the United Kingdom mobile app market.

|                                 |                                                                                                                                                                                                                                                                                                                                                                                                                   |
|---------------------------------|-------------------------------------------------------------------------------------------------------------------------------------------------------------------------------------------------------------------------------------------------------------------------------------------------------------------------------------------------------------------------------------------------------------------|
| Journal:                        | <i>BMJ Open</i>                                                                                                                                                                                                                                                                                                                                                                                                   |
| Manuscript ID                   | bmjopen-2018-027883.R1                                                                                                                                                                                                                                                                                                                                                                                            |
| Article Type:                   | Research                                                                                                                                                                                                                                                                                                                                                                                                          |
| Date Submitted by the Author:   | 15-Mar-2019                                                                                                                                                                                                                                                                                                                                                                                                       |
| Complete List of Authors:       | Rajani, Nikita; Imperial College London School of Public Health, Department of Primary care and Public Health<br>Weth, Dominik; MSU Consulting GmbH, Department of Strategy and Innovation<br>Mastellos , Nikolaos; Imperial College London, Department of Primary Care and Public Health<br>Filippidis, Filippos; Imperial College London, Department of Primary Care and Public Health, School of Public Health |
| <b>Primary Subject Heading</b>: | Public health                                                                                                                                                                                                                                                                                                                                                                                                     |
| Secondary Subject Heading:      | Smoking and tobacco                                                                                                                                                                                                                                                                                                                                                                                               |
| Keywords:                       | Smoking cessation, Gamification, Mobile applications, mHealth                                                                                                                                                                                                                                                                                                                                                     |
|                                 |                                                                                                                                                                                                                                                                                                                                                                                                                   |

SCHOLARONE™  
Manuscripts

1  
2  
3  
4 Use of gamification strategies and tactics in mobile applications for  
5 smoking cessation: a review of the United Kingdom mobile app  
6 market.  
7  
8  
9  
10  
11  
12

13 Nikita B. Rajani<sup>1</sup>, Dominik Weth<sup>2</sup>, Nikolaos Mastellos<sup>1</sup>, Filippos T. Filippidis<sup>1</sup>  
14  
15  
16

17  
18 <sup>1</sup> Department of Primary Care and Public Health, School of Public Health, Imperial College  
19 London, United Kingdom  
20  
21

22 <sup>2</sup> Department of Strategy and Innovation, MSU Consulting GmbH, Bad Homburg, Germany  
23  
24  
25  
26  
27  
28  
29  
30  
31

32 **Corresponding author:**  
33

34 Nikita B. Rajani  
35

36 Address: School of Public Health, Imperial College London, Reynolds Building, St.  
37

38 Dunstan's Road, London W6 8RP, United Kingdom  
39

40 Email: [nikita.rajani14@imperial.ac.uk](mailto:nikita.rajani14@imperial.ac.uk)  
41  
42

43 Telephone: +447427615928  
44  
45  
46  
47  
48  
49  
50  
51  
52  
53  
54  
55  
56  
57  
58  
59  
60

**Word count:** 3,482



## ABSTRACT

**Objective:** Mobile phone-based interventions have been proven to be effective tools for smoking cessation, at least in the short term. Gamification, i.e. the use of game-design elements in a non-game context, has been associated with increased engagement and motivation, critical success factors for long-term success of mHealth solutions. However, to date no app review has examined the use of gamification in smoking cessation mobile apps. Our review aims to examine and quantify the use of gamification strategies (broad principles) and tactics (on-screen features) among existing mobile apps for smoking cessation in the UK.

**Methods:** The UK Android and iOS markets were searched in February 2018 to identify smoking cessation apps. 125 Android and 15 iOS apps were tested independently by two reviewers for primary functionalities, adherence to Five A smoking cessation guidelines, and adoption of gamification strategies and tactics. We examined differences between platforms with chi-square tests. Correlation coefficients were calculated to explore the relationship between adherence to guidelines and gamification.

**Results:** The most common functionality of the 140 mobile apps we reviewed allowed users to track the days since/until the quit date (86.4%). The most popular gamification strategy across both platforms was performance feedback (91.4%). The majority of apps adopted a medium level of gamification strategies (55.0%) and tactics (64.3%). Few adopted high levels of gamification strategies (6.4%) or tactics (5.0%). No statistically significant differences between the two platforms were found regarding level of gamification ( $p\text{-value} > 0.05$ ) and weak correlations were found between adherence to Five A's and gamification strategies ( $r = 0.38$ ) and tactics  $r = (0.26)$ .

**Conclusion:** The findings of this review show that a high level of gamification is adopted by a small minority of smoking cessation apps in the UK. Further exploration of the use of gamification in smoking cessation apps may provide insights into its role in smoking cessation.

1  
2  
3 **Keywords:** Smoking cessation, gamification, mobile applications, mHealth  
4  
5  
6

7 **STRENGTHS AND LIMITATIONS OF THIS STUDY**  
8  
9

- 10  
11
- 12 • The study had a sample of 140 mobile apps for smoking cessation in the United  
13 Kingdom iOS and Google Play store
  - 14 • Since the architecture used to operationalise gamification was developed through  
15 review of taxonomies from both academic and non-academic sources, the architecture  
16 is representative of existing literature.  
17
  - 18 • The exclusion of apps with less than a 4-star rating or fewer than 5 ratings resulted in  
19 the omission of a large number of iOS apps, limiting the generalizability of the findings  
20 for the iOS store.  
21
  - 22 • Certain app functionalities and gamification elements that are only visible or activated  
23 upon long-term use may not have been identified by our review.  
24  
25  
26  
27  
28  
29  
30  
31  
32  
33  
34  
35  
36  
37  
38  
39  
40  
41  
42  
43  
44  
45  
46  
47  
48  
49  
50  
51  
52  
53  
54  
55  
56  
57  
58  
59  
60

## INTRODUCTION

Smoking is responsible for 16% of all deaths in the United Kingdom (UK) and remains one of the major preventable causes of chronic diseases.[1] According to a recent study, smoking is ranked as the number one risk factor driving death and disability within the UK.[2] Although behavioural support along with pharmacological treatments is evidently the most effective method for smoking cessation, not all individuals seeking to quit are able or willing to seek face-to-face support.[3] The number of individuals using smoking cessation services provided by the National Health Service in the UK is continuously falling,[4] a trend observed in multiple European countries.[5] The decline in use of stop smoking services is likely to be attributed to access issues in light of significant public health budget cuts.[6] On the other hand, due to increased digitalisation and diffusion of technologies, internet and mobile-based interventions are becoming more popular. The use of mobile-delivered support can be initiated independently by smokers, and can complement existing face-to-face support services. With their wide reach and low cost of dissemination, mobile health (mHealth) solutions represent a cost-effective method of helping people quit smoking.[7]

mHealth interventions have been identified as useful tools for aiding smoking cessation. A Cochrane review found that mobile-phone based cessation interventions had a beneficial impact on six-month cessation outcomes.[8] The systematic review concluded that smokers who received support from mobile-phone based interventions were 1.7 times more likely to quit in the short-term compared to those who did not receive the mobile-phone based intervention.[8] Although several mobile apps for smoking cessation exist, many suffer from low engagement and retention levels. According to Singh & Bates (2016), attaining high levels of user engagement is critical for the success of mHealth which is why it is an important focus of mHealth solutions.[9]

1  
2  
3 The application of gamification, the “use of game-design elements in a non-game context”, [10]  
4  
5 in the field of mHealth is rapidly emerging, with mobile app developers increasingly integrating  
6  
7 badges and other elements of gamification to motivate and engage users. There is no shortage  
8  
9 of gamification advocates, particularly in the context of health behaviour change and mHealth.  
10  
11 Some examples of mHealth apps which use gamification and have been empirically studied  
12  
13 include *Zombies, Run!* to increase physical activity, *SPARX* for battling depression, *Mango*  
14  
15 *Health* for improving retention of medication use, and *FitGame* to increase intake of fruits and  
16  
17 vegetables. [11-14] A study on *Zombies, Run!* found the mobile app increases the motivation of  
18  
19 participants to run and uplifts their confidence. [11] Likewise, *SPARX* was found to reduce  
20  
21 depression scores and act as a potential alternative to usual treatment in primary care for  
22  
23 adolescents suffering from depressive symptoms. [12]

24  
25  
26 According to a randomised controlled trial, individuals who had access to a gamified version  
27  
28 of a web-based intervention to aid arthritis patients, had a higher level of engagement than those  
29  
30 offered the intervention without game elements. [15] Similarly, a study found that participants  
31  
32 who utilised a gamified smoking cessation intervention had higher levels of motivation and  
33  
34 engagement compared to a non-gamified cohort. [16] Gamification has also been associated  
35  
36 positively with self-efficacy and psychological empowerment, among other behavioural and  
37  
38 psychological outcomes. [15, 17-19]

39  
40  
41 Despite the increased application of gamification in the mHealth industry and the promising  
42  
43 findings of its benefits for health behaviour change, [20] little research has examined the use of  
44  
45 gamification in the context of mHealth and smoking cessation. Although some reviews on  
46  
47 gamification use in health apps have been conducted, they have not explicitly focused on apps  
48  
49 for smoking cessation or the UK app market. [20-21] Of the reviews that have focused on mobile  
50  
51 apps for smoking cessation, [22-26] none explicitly explored gamification use and only two  
52  
53 focused on the UK app market in 2012 and 2014. [27-28] Since the mobile app market is  
54  
55  
56  
57  
58  
59  
60

1  
2  
3 constantly evolving, it is important that a more up-to-date review is conducted to gain insight  
4  
5 on the currently available mobile apps for smokers seeking to quit. Our study investigated  
6  
7 mobile apps for smoking cessation currently available in the UK to gain insight on the types of  
8  
9 apps available and their functionalities. Moreover, we examined the types of gamification  
10  
11 elements and the level of gamification implemented in the mobile apps. The findings of our  
12  
13 research can have important implications for smokers seeking to quit via mHealth, mobile app  
14  
15 developers and tobacco policy makers.  
16  
17  
18  
19

## 20 **METHODS**

### 21 **Sample and Procedure**

22  
23  
24  
25 The methodology of the mobile app review included three stages: identification, screening and  
26  
27 testing. To identify mobile apps available on both Android and iOS platforms in the UK, the  
28  
29 software 42matters was used.[29] 42 matters is an online service that provides app market and  
30  
31 audience data to provide insight into the mobile app market to build new products. Data on app  
32  
33 market Application Programming Interface (API) were extracted using the software on  
34  
35 February 19<sup>th</sup> 2018 using search terms consistent with prior mobile app reviews: “stop  
36  
37 smoking” “quit smoking” and “smoking cessation”. [22-26]  
38  
39  
40

41  
42 Apps were then screened independently by two researchers. Apps with duplicate identification  
43  
44 numbers (assigned by the 42matters software to each unique app) were eliminated. Moreover,  
45  
46 apps with no rating, a rating of less than four (out of five) or fewer than five individual ratings  
47  
48 were eliminated. The cut-off point of five individual ratings is already set forth by the Apple  
49  
50 Store. In order to treat apps from both stores equally, we applied the same cut-off point to  
51  
52 Android apps. Whilst the methodology used by Android and Apple stores to rank apps is not  
53  
54 transparent, it is accepted that the rating, number of ratings, downloads and reviews can be used  
55  
56 to determine an app’s popularity. Using popularity as an inclusion or exclusion criterion for  
57  
58  
59  
60

1  
2  
3 mobile app reviews is a common methodology adopted in past studies as it ensures that the  
4 most widely used and most 'liked' apps are evaluated.[30-32]  
5  
6  
7

8 Once preliminary criteria had been applied, the remaining apps were screened based on the  
9 description and screenshots of mobile apps provided on their main page in the store. The  
10 information was used to apply the following exclusion criteria: primary aim was not to help  
11 smokers quit; app was not in the English language; app was irrelevant (i.e. app had nothing to  
12 do with smoking cessation but was still captured by the software due to the inputted search  
13 terms); app focused on hypnosis; and app targeted specific patient groups or healthcare  
14 professionals. Further exclusions were conducted upon installation of mobile apps. Hypnosis  
15 apps were excluded because it is not an evidence-based strategy for smoking cessation.[33]  
16  
17 Additional exclusion criteria upon installation included: unsuccessful download of the app;  
18 software problems upon installation; and requirement for additional devices such as  
19 smartwatches. After screening was complete, a total of 140 mobile apps remained of which 125  
20 were Android apps and 15 were iOS apps. Three mobile apps were found in both platforms but  
21 were still assessed independently by both reviewers as slight variations between Android and  
22 iOS versions exist. The procedure inclusive of the number of apps excluded in each stage of the  
23 methodology can be seen in figure 1.  
24  
25  
26  
27  
28  
29  
30  
31  
32  
33  
34  
35  
36  
37  
38  
39  
40  
41  
42

43 [Insert Figure 1]  
44  
45

### 46 **Coding and Classification of Mobile Apps**

47  
48

49 After screening procedures, two reviewers independently tested each app. Every app was  
50 installed and reviewed for approximately 30 minutes on the day of installation. The next day,  
51 each mobile app was reviewed for approximately 5 minutes for the delivery of any additional  
52 notifications. Similar to screening, discrepancies not resolved by the two reviewers, led to a  
53 consultation and final decision from a third reviewer.  
54  
55  
56  
57  
58  
59  
60

### *General Functionalities*

Functionalities of apps were coded based on categories consistently used by previous mobile app reviews on smoking cessation.[23-25] The categories included: (1) Tracker: the app tracked the number of days elapsed since the user quit smoking and/or the number of days until the user's quit date; (2) Calculator: the app primarily calculated the amount of money a smoker saved by not smoking and/or the health benefits attained by abstaining; (3) Rationing: the app prompted the user to limit the number of cigarettes smoked and/or how often the user can smoke a cigarette (e.g. providing time limits); (4) Informational: app provided information in the form of text and images to provide the user with knowledge on various aspects of smoking cessation; (5) Game: app took the form of a game to help users quit; (6) Lung Health Monitor: app measured and tracks the user's lung function and health; and (7) Other: all functionalities that did not fit one of the six other categories.

### *Five A Guidelines*

To understand whether apps were developed with scientific input, we assessed them against the Five A's framework (Ask, Assess, Advise, Assist, Arrange) for behaviour change.[34] This framework is globally accepted as a tool to inform and develop health behaviour change interventions (supplementary table 1). It has been applied to various behaviours including smoking cessation.

### *Gamification*

To assess gamification, an architecture developed by Cugelman (2013) was used.[35] It consists of two parts: (1) the persuasive and broad principles of gamification, also known as gamification strategies, and (2) the on-screen features of gamification that users interact with, also known as gamification tactics. Cugelman (2013) developed this architecture through a review of a number of other taxonomies presented both in academic and non-academic

1  
2  
3 sources.[35] A large amount of overlap existed when compared to other frameworks; Cugelman  
4  
5 (2013) captured the active ingredients of gamification as represented in the literature. The  
6  
7 architecture used to operationalise gamification can be seen in figure 2.  
8  
9

10 [Insert Figure 2]  
11  
12

### 13 **Data Analysis**

14  
15  
16 To examine the price, ratings and features of mobile apps descriptive statistics were calculated.  
17  
18 We classified the level of gamification strategies as none; low (1-2 strategies); medium (3-5  
19  
20 strategies); and high (6-7 strategies). Similarly, we classified the level of gamification tactics  
21  
22 as none; low (1-3 tactics); medium (4-7 tactics); and high (8-10 tactics). The cut-off points used  
23  
24 were arbitrary, as there is no previous research identifying specific thresholds with meaningful  
25  
26 implications. In order to investigate any differences between the two mobile platforms, we used  
27  
28 Pearson chi-square tests for independence. For instances when the frequency count was less  
29  
30 than 5, we used Fisher's exact test of independence. A significance level of  $p < 0.05$  was set to  
31  
32 determine statistical significance. We also calculated correlation coefficients to explore the  
33  
34 association between adherence to Five A guidelines and gamification strategies and tactics. All  
35  
36 statistical analyses were conducted using STATA 12.1.  
37  
38  
39  
40  
41

### 42 **Patient and Public Involvement**

43  
44  
45 The study had no patient or public involvement.  
46  
47  
48  
49  
50

## 51 **RESULTS**

### 52 **App functionalities**

53  
54  
55 Table 1 presents the general characteristics of mobile apps for smoking cessation across both  
56  
57 platforms. The most common feature amongst apps across both platforms was the tracker  
58  
59  
60



feature which allows users to track the day until and/or since quitting (86.4%). A large majority of apps included a calculator feature which helps users calculate money saved or health benefits accrued since quitting (80.3%). Only 15.7% of apps across both platforms were informational, and only a small number were games or included games to help smokers quit (11.4%). Across both platforms, the majority of apps tested were free (85.0%) and the average user rating across was 4.4 since apps with less than a 4-star rating were excluded.

Table 1. Overview of mobile apps for smoking cessation

|                  |                        | Platform         |                    |                        |
|------------------|------------------------|------------------|--------------------|------------------------|
|                  |                        | iOS (n=15)       | Android (n=125)    | Both Platforms (n=140) |
| Features of Apps | Calculator             | 15 (100%)        | 99 (79.2%)         | 114 (80.3%)            |
|                  | Rationing              | 1 (6.7%)         | 24 (19.2%)         | 25 (17.9%)             |
|                  | Tracker                | 15 (100%)        | 106 (84.8%)        | 121 (86.4%)            |
|                  | Informational          | 4 (26.7%)        | 18 (14.4%)         | 22 (15.7%)             |
|                  | Game                   | 0 (0%)           | 16 (12.8%)         | 16 (11.4%)             |
|                  | Lung Health Monitor    | 0 (0%)           | 0 (0%)             | 0 (0%)                 |
|                  | Other                  | 1 (6.7%)         | 4 (3.2%)           | 5 (3.6%)               |
| Cost             | Free                   | 14 (93.3%)       | 105 (84.0%)        | 119 (85.0%)            |
|                  | Paid                   | 1 (6.7%)         | 20 (16.0%)         | 21 (15.0%)             |
|                  | Mean Price (£)         | 1.0 (0.0 – 0.99) | 2.2 (0.0 – 8.6)    | 2.1 (0.0 – 8.6)        |
| Popularity       | Mean User Rating       | 4.6 (4.1 – 5.0)  | 4.4 (4.0 – 5.0)    | 4.4 (4.0 – 5.0)        |
|                  | Mean Number of Ratings | 821 (6 – 6,500)  | 1,726 (6 – 35,045) | 1,629 (6 – 35,045)     |

## Five A Guidelines

We found that 92 out of 140 (65.7%) mobile apps across both platforms only adhered to 1-2 out of the Five A's. Only 3 out of 140 mobile apps (2.1%) adhered to all Five A guidelines, indicating a low level of scientific and evidence-based development of the mobile apps. Supplementary table 2 displays detailed results regarding adherence to Five A guidelines.

## Gamification

An overview of the number and percentage of each gamification strategy and tactic adopted by mobile apps is presented in table 2. The most popular gamification strategy across both platforms was feedback on performance (91.4%). A majority of the apps allowed users to track

1  
2  
3 their smoking habits or calculate money and health benefits, hence this gamification strategy  
4 was inherently present. Although almost two thirds of mobile apps across both platforms  
5 (64.3%) utilised goal setting to motivate users, only 28.6% of apps provided users with the  
6 capacity and support to reach the goals set and the challenges faced. For example, “Smoking  
7 Log – Stop Smoking” is an example of an app which was reviewed that enabled the user to set  
8 goals with regard to the number of cigarettes the user can smoke that day or the time until the  
9 next cigarette can be smoked, but it provides no support or advice to the user on how this goal  
10 can be achieved.[36]  
11  
12  
13  
14  
15  
16  
17  
18  
19  
20  
21

22 Additionally, 69 out of 140 mobile apps across both platforms adopted social connectivity  
23 (49.3%). However, most of these achieved this by including share options with popular social  
24 media platforms. Only a few of the apps provided users with social communities integrated into  
25 the app itself to share thoughts or discuss progress with other smokers trying to quit. Finally,  
26 the least common gamification strategy observed in the apps was fun and playfulness (7.9%).  
27 This finding is consistent with the low presence of on-screen gamification tactics, such as  
28 showing game leaders (4.3%) and including a theme or story within the app (4.3%). No  
29 statistically significant differences between the two platforms were found for any of the  
30 gamification strategies or tactics (p-value>0.05).  
31  
32  
33  
34  
35  
36  
37  
38  
39  
40  
41  
42  
43

44 Table 2. Number of gamification principles and strategies

|                         |                                 | Platform    |                 |              | Chi-Square P-Value |
|-------------------------|---------------------------------|-------------|-----------------|--------------|--------------------|
|                         |                                 | iOS (n=15)  | Android (n=125) | Both (n=140) |                    |
| Gamification Strategies | Goal setting                    | 10 (66.7%)  | 80 (64.0%)      | 90 (64.3%)   | 0.839              |
|                         | Capacity of overcome challenges | 7 (46.7%)   | 33 (26.4%)      | 40 (28.6%)   | 0.101              |
|                         | Feedback on performance         | 15 (100.0%) | 113 (90.4%)     | 128 (91.4%)  | 0.363              |
|                         | Reinforcement                   | 10 (66.7%)  | 61 (48.8%)      | 71 (50.7%)   | 0.191              |
|                         | Compare progress                | 4 (26.7%)   | 17 (13.6%)      | 21 (15.0%)   | 0.242              |
|                         | Social connectivity             | 9 (60.0%)   | 60 (48.0%)      | 69 (49.3%)   | 0.380              |
|                         | Fun and playfulness             | 1 (6.7%)    | 10 (8.0%)       | 11 (7.9%)    | 1.000              |
|                         | Provides clear goals            | 10 (66.7%)  | 80 (64.0%)      | 90 (64.3%)   | 0.839              |
|                         | Offers a challenge              | 10 (66.7%)  | 80 (64.0%)      | 90 (64.3%)   | 0.839              |

|                      |                                  |             |             |             |       |
|----------------------|----------------------------------|-------------|-------------|-------------|-------|
| Gamification Tactics | Uses levels                      | 3 (20.0%)   | 25 (20.0%)  | 28 (20.0%)  | 1.000 |
|                      | Allocates points                 | 1 (6.7%)    | 9 (7.2%)    | 10 (7.1%)   | 1.000 |
|                      | Shows progress                   | 15 (100.0%) | 113 (90.4%) | 128 (91.4%) | 0.363 |
|                      | Provides feedback                | 15 (100.0%) | 113 (90.4%) | 128 (91.4%) | 0.363 |
|                      | Gives rewards                    | 10 (66.7%)  | 61 (48.8%)  | 71 (50.7%)  | 0.191 |
|                      | Provides badges for achievements | 9 (60.0%)   | 49 (39.2%)  | 58 (41.4%)  | 0.122 |
|                      | Shows game leaders               | 1 (6.7%)    | 5 (4.0%)    | 6 (4.3%)    | 0.500 |
|                      | Gives a story/theme              | 1 (6.7%)    | 5 (4.0%)    | 6 (4.3%)    | 0.500 |

\*P-value < 0.05

Table 3 presents the level of gamification adopted by mobile apps, in terms of the number of strategies and the number of on-screen features (also known as gamification tactics). Only 7.1% of apps across platforms did not adopt any gamification strategy or tactic. More than half of mobile apps across both platforms had adopted a medium level of gamification strategies (55.0%) and tactics (64.3%). However, only a minority adopted a high level of gamification strategies (6.4%) or a high level of gamification tactics (5.0%). No statistically significant differences between the two platforms were found with relation to the level of gamification strategies or tactics (p-value>0.05).

Table 3. Level of gamification incorporated in mobile apps for smoking cessation.

|                                           |              | Platform      |                    |                           | Chi-Square |
|-------------------------------------------|--------------|---------------|--------------------|---------------------------|------------|
|                                           |              | iOS<br>(n=15) | Android<br>(n=125) | Both Platforms<br>(n=140) | P-Value    |
| Number of gamification strategies adopted | 0 (None)     | 0 (0.0%)      | 10 (8.0%)          | 10 (7.1%)                 | 0.600      |
|                                           | 1-2 (Low)    | 4 (26.7%)     | 40 (32.0%)         | 44 (31.4%)                | 0.776      |
|                                           | 3-5 (Medium) | 9 (60%)       | 68 (54.4%)         | 77 (55.0%)                | 0.700      |
|                                           | 6-7 (High)   | 2 (13.3%)     | 7 (5.6%)           | 9 (6.4%)                  | 0.248      |
| Number of gamification tactics adopted    | 0 (None)     | 0 (0.0%)      | 10 (8.0%)          | 10 (7.1%)                 | 0.600      |
|                                           | 1-3 (Low)    | 4 (26.7%)     | 29 (23.2%)         | 33 (23.6%)                | 0.753      |
|                                           | 4-7 (Medium) | 9 (60.0%)     | 81 (64.8%)         | 90 (64.3%)                | 0.714      |
|                                           | 8-10 (High)  | 2 (13.3%)     | 5 (4.0%)           | 7 (5.0%)                  | 0.164      |

\*P-value < 0.05

Furthermore, we tested whether adherence to Five A guidelines and the number of gamification strategies and tactics incorporated in smoking cessation mobile apps were related by calculating correlation coefficients (supplementary table 3). We found that across all mobile apps (n=140)

1  
2  
3 the numbers of gamification tactics and strategies were only weakly correlated with adherence  
4 to Five A guidelines, an indicator for level of scientific input ( $r= 0.26$  and  $r=0.38$  respectively).  
5  
6  
7  
8  
9

## 10 **DISCUSSION**

11  
12 We reviewed mobile apps for smoking cessation available in the UK Android and iOS app  
13 stores and found that most of them incorporated a limited number of gamification elements and  
14 strategies.  
15  
16  
17  
18  
19

20 We found that a majority of apps tested in our review allowed users to calculate the money  
21 saved or health benefits accrued since quitting. The popularity of this feature amongst mobile  
22 apps for smoking cessation is consistent with findings from prior reviews conducted outside of  
23 the UK market.[23-26] A large proportion of smoking cessation apps available on the UK  
24 market also allow users to track the day until and or since quitting. The integration of tracker  
25 and calculator features permits users to self-monitor their progress, a technique which has been  
26 associated with increased effectiveness for health behaviour change.[37-41]  
27  
28  
29  
30  
31  
32  
33  
34  
35  
36

37 Across both platforms the most common gamification strategy adopted was feedback on  
38 performance. This finding is consistent with another review which found that 60 out of 64  
39 gamified health apps included feedback and monitoring.[21] The least common gamification  
40 strategy was fun and playfulness which requires app developers to include on-screen features  
41 such as a story or theme for the entertainment and liking of the user. Most apps do not  
42 incorporate such elements likely because they are more difficult to implement in comparison to  
43 basic tracker and calculator features which inherently provide feedback on performance. Goal  
44 setting was present in more than 60% of apps. This is promising as past research suggests that  
45 goal setting is a fundamental component for successful health behaviour change  
46 interventions.[42] Although several apps allow users to set goals, not many provide advice or  
47 information on how to set realistic and appropriate goals, or how to achieve them.  
48  
49  
50  
51  
52  
53  
54  
55  
56  
57  
58  
59  
60

1  
2  
3 Nearly half of the apps implement social connectivity as a gamification strategy. However, most  
4 do so by providing basic and easily implementable options of sharing results and progress to  
5 others via popular social media platforms rather than setting up social communities where  
6 thoughts and progress can be discussed with other smokers attempting to quit. Online social  
7 communities provide a platform for additional support, as well as a channel to interact with  
8 others seeking to quit. Two systematic reviews have found that online social networks and  
9 features can be effective and have a positive influence on health behaviour change.[43-44]  
10  
11 Aside from social support, social connectivity features can drive user engagement via the  
12 mechanism of social comparison, which suggests that people compare themselves with others  
13 as a method of self-evaluation, which can impact behavioural outcomes.[45].  
14  
15

16  
17 Regarding the level of gamification, our results indicate that a majority of apps adopt a medium  
18 level of gamification strategies and/or tactics, with few adopting no gamification or a high level  
19 of gamification. Several gamification elements, such as providing feedback and displaying  
20 progress, are inherently present in mobile apps (e.g. Instagram, Google Maps) that would not  
21 generally be perceived as gamified. As a consequence of this, existing literature and our analysis  
22 may overestimate the level of gamification truly present. Refining gamification taxonomies to  
23 better measure the true level of gamification would allow researchers to look beyond elements  
24 inherently found in mobile apps.  
25  
26

27  
28 Despite the possible overestimation of the level of gamification in mobile apps, research shows  
29 that gamification can positively impact psychological and behavioural outcomes.[12-19]  
30  
31 Consequently, gamification can be an important part of persuasive design of mobile apps for  
32 smoking cessation which can result in higher user engagement and could thus provide a  
33 potentially cost-effective method to improve smoking cessation rates, thereby achieving a  
34 substantial public health impact Past research has shown the benefits of mobile and internet-  
35 based interventions for individuals of lower socioeconomic status;[46-47] hence the provision  
36  
37  
38  
39  
40  
41  
42  
43  
44  
45  
46  
47  
48  
49  
50  
51  
52  
53  
54  
55  
56  
57  
58  
59  
60

1  
2  
3 of effective mobile apps for smoking cessation could reduce health inequalities by increasing  
4  
5 cessation rates amongst disadvantaged groups. However, the development of gamified mobile  
6  
7 apps for smoking cessation requires collaboration between gaming experts, software  
8  
9 developers, behaviour change specialists and smoking cessation experts. . Further research  
10  
11 needs to continue to investigate gamified mobile apps for smoking cessation in randomised  
12  
13 controlled trials to assess effectiveness on quit rates, as well as the potential benefits.  
14  
15

16  
17 There are several strengths of our review. The focus on the UK mobile app market, which has  
18  
19 not been extensively studied in past literature, helps gain insight on mobile app interventions  
20  
21 available in this geographic region. Moreover, we tested apps available in two major app stores,  
22  
23 inclusive of apps with a cost. Past mobile app reviews focusing on smoking cessation apps  
24  
25 available in the UK did not examine apps available on the Android app store nor apps that have  
26  
27 to be paid for.[27-28] Our findings are up to date and representative of the entire UK mobile  
28  
29 app market  
30  
31  
32

33  
34 Our findings are also bound by some limitations. Due to the exclusion criteria, apps with less  
35  
36 than a 4-star rating or apps with fewer than 5 ratings were excluded. This particularly led to the  
37  
38 exclusion of a large number of iOS apps and therefore could have an effect on the  
39  
40 generalizability of the findings. Future research could evaluate apps with lower ratings and  
41  
42 explore whether gamification levels are correlated with user ratings as such research can have  
43  
44 important implications for app developers and health researchers during the design and  
45  
46 development of health apps. Additionally, since all mobile apps were reviewed for  
47  
48 approximately 30 minutes on the day of installation and a few minutes the next day, it could be  
49  
50 that certain app functionalities that are only visible or activated upon long-term use would not  
51  
52 have been recorded. Future studies could explore app functionalities and gamification features  
53  
54 for a longer period of time to ensure that apps that have multiday cessation programmes are  
55  
56 accurately assessed. Although our review examined adherence to cessation guidelines as an  
57  
58  
59  
60

1  
2  
3 indicator of scientific input, we did not assess the overall quality of mobile apps and hence were  
4  
5 not able to correlate level of gamification to app quality. Such analyses would require rigorous  
6  
7 assessment of app quality with evidence-based tools, such as the Mobile App Rating Scale.[48]  
8  
9

## 10 **CONCLUSION**

11  
12 Our research comprehensively reviewed the UK market for smoking cessation mobile  
13  
14 applications in early 2018. Our findings showed that a medium level of gamification was  
15  
16 adopted by just over half of the smoking cessation apps and only a minority adopted a high  
17  
18 level of gamification or incorporate more complex and difficult to implement gamification  
19  
20 features. Since gamification can be used to address critical limitations of mHealth interventions,  
21  
22 such as engagement and retention, our research shows that increased effort and collaboration  
23  
24 between gaming experts, software developers and smoking cessation specialists is essential for  
25  
26 the development of gamified mobile apps for smoking cessation.  
27  
28  
29  
30  
31  
32  
33  
34

## 35 **DECLARATIONS**

36  
37 **Ethical approval:** Primary data was collected and analysed by the authors from publicly  
38  
39 available sources. No participants were involved nor was an intervention administered. No  
40  
41 ethical approval was required.  
42  
43

44 **Consent to Publish:** Not applicable.  
45

46 **Competing interests:** No competing interests.  
47

48  
49 **Funding:** This research received no specific grant from any funding agency in the public,  
50  
51 commercial or not-for-profit sectors.  
52

53 **Data Sharing Statement:** All data were extracted from mobile apps available to download on  
54  
55 iOS and Google stores. Details of the extracted data are available by the authors upon request.  
56

57 **Author Contributions:** NR conducted the mobile app review and produced the first draft of  
58  
59 the paper. DW acted as a second reviewer and helped consolidate the results of the review. FF  
60

1  
2  
3 and NM provided guidance on the overall methodology of the review and revised the  
4 manuscript for content. All authors contributed to the interpretation of results, read and  
5 approved the final manuscript.  
6  
7  
8

9  
10 **Acknowledgements:** Not applicable.  
11  
12

### 13 **FIGURE LEGEND**

14  
15  
16 **Figure 1.** Identification, Screening and Testing Stages of the Mobile App Review  
17

18  
19 **Figure 2.** Gamification Principles and Tactics Framework  
20  
21  
22  
23  
24  
25  
26  
27  
28  
29  
30  
31  
32  
33  
34  
35  
36  
37  
38  
39  
40  
41  
42  
43  
44  
45  
46  
47  
48  
49  
50  
51  
52  
53  
54  
55  
56  
57  
58  
59  
60



## REFERENCES

1. National Health Service [Internet]. Statistics on Smoking – England, 2018 [PAS] 3rd July 2018. Available from: <https://digital.nhs.uk/data-and-information/publications/statistical/statistics-on-smoking/statistics-on-smoking-england-2018/content>
2. healthdata.org [Internet]. Institute for Health Metrics and Evaluation: United Kingdom. 2016. Available from: <http://www.healthdata.org/united-kingdom> (accessed 4 Oct 2018)
3. Stead LF, Koilpillai P, Fanshawe TR, et al. Combined pharmacotherapy and behavioural interventions for smoking cessation. *Cochrane Database Syst Rev* 2016(3). Available from: <https://www.cochranelibrary.com/cdsr/doi/10.1002/14651858.CD008286.pub3/full> (accessed 5 Oct 2018)
4. Iacobucci, G. Stop smoking services: BMJ analysis shows how councils are stubbing them out. *BMJ* 2018; 362:k3649.
5. Filippidis FT, Lavery AA, Mons U, Jimenez-Ruiz C, Vardavas CI. Changes in smoking cessation assistance in the European Union between 2012 and 2017: pharmacotherapy versus counselling versus e-cigarettes. *Tob Control* [Internet] 2018;28(1):95-100. Available from: <https://tobaccocontrol.bmj.com/content/early/2018/03/21/tobaccocontrol-2017-054117> (accessed 5 Oct)
6. Iacobucci G. Number of people using NHS stop smoking services continues to fall. *BMJ* 2017;358:j3936.
7. World Health Organisation [Internet]. mHealth: Use of appropriate digital technologies for public health. Seventy First World Health Assembly, A71/20. 26<sup>th</sup> March 2018. Available from: [http://apps.who.int/gb/ebwha/pdf\\_files/WHA71/A71\\_20-en.pdf](http://apps.who.int/gb/ebwha/pdf_files/WHA71/A71_20-en.pdf)
8. Whittaker R, McRobbie H, Bullen C, Rodgers A, et al. Mobile phone-based interventions for smoking cessation. *Cochrane Database of Syst Rev* 2016;4:Cd006611.
9. Singh K, Drouin K, Newmark LP, et al. Developing a Framework for Evaluating the Patient Engagement, Quality, and Safety of Mobile Health Applications. *Issue brief (Commonw Fund)* 2016;5:1-11.
10. Deterding S, Dixon D, Khaled R, et al. From game design elements to gamefulness: defining "gamification". Proceedings of the 15th International Academic MindTrek Conference: Envisioning Future Media Environments; Tampere, Finland. 2181040: ACM; 2011. p. 9-15.
11. Moran MJ & Coons JM. Effects of a Smart-phone Application on Psychological, Physiological, and Performance Variables in College-Aged Individuals While Running. *Int J of Exerc Sci* 2015 8(2):104-111

12. Merry SN, Stasiak K, Shepherd M, et al. The effectiveness of SPARX; a computerised self-help intervention for adolescents seeking help for depression: randomised controlled non-inferiority trial. *BMJ Open* [Internet] 2012. Available from: <https://www.bmj.com/content/344/bmj.e2598>
13. Nguyen E, Bugno L, Kandah C, et al. Is there a good app for that? Evaluating m-Health apps for strategies that promote pediatric medication adherence. *Telemedicine and e-health* 2015;22(11):929-937. Available from: <https://www.ncbi.nlm.nih.gov/pubmed/27070837>
14. Jones BA, Madden GJ & Wengreen HJ. The FIT Game: preliminary evaluation of a gamification approach to increasing fruit and vegetable consumption in school. *Prev Med* 2016;68:76-79.
15. Allam A, Kostova Z, Nakamoto K, Schulz PJ. The effect of social support features and gamification on a Web-based intervention for rheumatoid arthritis patients: randomized controlled trial. *J. Med Internet Res* 2015;17(1):e14.
16. El-Hilly AA, Iqbal SS, Ahmed M, et al. Game On? Smoking Cessation Through the Gamification of mHealth: A Longitudinal Qualitative Study. *JMIR Serious Games* 2016;4(2):e18.
17. Harold DJ. A Qualitative Study on the Effects of Gamification on Student Self-Efficacy. International Society for Technology in Education Conference; Philadelphia2015.
18. Banfield J & Wilkerson B. Increasing Student Intrinsic Motivation and Self-Efficacy through Gamification Pedagogy. *Contemporary Issues in Education Research* 2014;7(4):291-8.
19. Johnson D, Deterding S, Kuhn K-A, et al. Gamification for health and wellbeing: A systematic review of the literature. *Internet Interventions* 2016;6:89-106.
20. Lister C, West JH, Cannon B, et al. Just a fad? Gamification in health and fitness apps. *JMIR serious games* 2014;2(2):e9-e.
21. Edwards EA, Lumsden J, Rivas C, et al. Gamification for health promotion: systematic review of behaviour change techniques in smartphone apps. *BMJ Open* 2016;6(10):e012447.
22. Choi J, Noh GY, Park DJ. Smoking cessation apps for smartphones: content analysis with the self-determination theory. *J of Med Internet Res* 2014;16(2):e44.
23. Abroms LC, Lee Westmaas J, Bontemps-Jones J, et al. A content analysis of popular smartphone apps for smoking cessation. *Am J Prev Med* 2013;45(6):732-6.
24. Abroms LC, Padmanabhan N, Thaweethai L, et al. iPhone apps for smoking cessation: a content analysis. *Am J Prev Med* 2011;40(3):279-85.

- 1  
2  
3 25. Hoepfner BB, Hoepfner SS, Seaboyer L, et al. How Smart are Smartphone Apps for  
4 Smoking Cessation? A Content Analysis. *Nicotine Tob Res* 2016;18(5):1025-31.  
5  
6  
7 26. Bennett ME, Toffey K, Dickerson F, et al. A Review of Android Apps for Smoking  
8 Cessation. *Journal of Smoking Cessation* 2015;10(2):106-15.  
9  
10  
11 27. Ubhi KH, Kotz D, Michie S, et al. Comparative analysis of smoking cessation smartphone  
12 applications available in 2012 versus 2014. *Addict Behav* 2016;58:175-181.  
13  
14  
15 28. Ubhi KH, Michie S, Kotz D, et al. Characterising smoking cessation smartphone  
16 applications in terms of behaviour change techniques, engagement and ease-of-use features.  
17 *Transl Behav Med* 2016;6(3): 410-417.  
18  
19  
20 29. App Market API [Internet]. Available from: <https://42matters.com/>.  
21  
22  
23 30. Azar KM, Lesser LI, Laing BY, et al. Mobile applications for weight management:  
24 theory-based content analysis. *Am J Prev Med* 2013;45(5):583-9.  
25  
26  
27 31. Breton ER, Fuemmeler BF, Abrams LC. Weight loss—there is an app for that! But does it  
28 adhere to evidence-informed practices? *Transl Behav Med* 2011;1(4):523-9.  
29  
30  
31 32. Cowan LT, Van Wagenen SA, Brown BA, et al. Apps of steel: are exercise apps  
32 providing consumers with realistic expectations? A content analysis of exercise apps for  
33 presence of behavior change theory. *Health Educ Behav* 2013;40(2):133-9.  
34  
35  
36 33. Barnes J, Dong CY, McRobbie H, et al. Hypnotherapy for smoking cessation. *Cochrane*  
37 *Database Syst Rev* 2010(10). Available from:  
38 <https://www.cochranelibrary.com/cdsr/doi/10.1002/14651858.CD001008.pub2/full>  
39  
40  
41 34. World Health Organisation. (2014) Toolkit for delivering the 5A's and 5R's brief tobacco  
42 interventions in primary care. Geneva. Available from:  
43 [http://www.who.int/tobacco/publications/smoking\\_cessation/9789241506946/en/](http://www.who.int/tobacco/publications/smoking_cessation/9789241506946/en/) (accessed  
44 8th Sept 2018)  
45  
46  
47 35. Cugelman B. Gamification: What It Is and Why It Matters to Digital Health Behaviour  
48 Change Developers. *JMIR Serious Games* 2013;1(1):e3.  
49  
50  
51 36. Charlton C. Smoking Log – Stop Smoking. Google Play Store [Internet] Available from:  
52 <https://play.google.com/store/apps/details?id=com.ccswe.SmokingLog&hl=en> (accessed 26  
53 Feb 2018)  
54  
55  
56 37. Greaves CJ, Sheppard KE, Abraham C, et al. Systematic review of reviews of intervention  
57 components associated with increased effectiveness in dietary and physical activity  
58 interventions. *BMC Public Health* [Internet] 2011;11:19. Available from:  
59 <https://bmcpublikealth.biomedcentral.com/articles/10.1186/1471-2458-11-119> (accessed 1  
60 Oct 2018)

- 1  
2  
3 38. van Achterberg T, Huisman-de Waal GG, Ketelaar NA, et al. How to promote healthy  
4 behaviours in patients? An overview of evidence for behaviour change techniques. *Health*  
5 *Promot Int* 2011;26(2):148-62.  
6  
7  
8 39. Bartlett YK, Sheeran P & Hawley MS. Effective behaviour change techniques in smoking  
9 cessation interventions for people with chronic obstructive pulmonary disease: A meta-  
10 analysis. *Br J Health Psychol* 2014;19(1):181-203. Available from:  
11 <https://www.ncbi.nlm.nih.gov/pmc/articles/PMC4253323/>  
12  
13  
14 40. Vries HD, Eggers SM & Bolman C. The role of action planning and plan enactment for  
15 smoking cessation. *BMC Public Health* 2013;13(1):393. Available from:  
16 <https://bmcpublichealth.biomedcentral.com/articles/10.1186/1471-2458-13-393>  
17  
18  
19 41. Lorencatto F, West R & Michie S. Specifying evidence-based behaviour change  
20 techniques to aid smoking cessation in pregnancy. *Nicotine Tob Res* 2012;14(9):1019-1026.  
21 Available from:  
22  
23  
24 42. Epton T, Currie S, Armitage CJ. Unique effects of setting goals on behavior change:  
25 Systematic review and meta-analysis. *J Consult Clin Psychol* [Internet] 2017;85(12):1182-  
26 1198. Available from: <https://www.ncbi.nlm.nih.gov/pubmed/29189034> (accessed 4 Oct  
27 2018)  
28  
29  
30 43. Laranjo L, Arguel A, Neves AL, et al. The influence of social networking sites on health  
31 behavior change: a systematic review and meta-analysis. *JAMIA* 2015;22(1):243-56.  
32  
33  
34 44. Maher CA, Lewis LK, Ferrar K, et al. Are health behavior change interventions that use  
35 online social networks effective? A systematic review. *J Med Internet Res* 2014;16(2):e40-e.  
36  
37  
38 45. Festinger L. A Theory of Social Comparison Processes. *Human Relations* 1954;7(2):117-  
39 40.  
40  
41  
42 46. Hiscock R, Bauld L, Amos A, et al. Smoking and socioeconomic status in England: the  
43 rise of the never smoker and the disadvantaged smoker. *J Public Health (Oxf)*  
44 2012;34(3):390-6.  
45  
46  
47 47. Hiscock R, Dobbie F, Bauld L. Smoking Cessation and Socioeconomic Status: An Update  
48 of Existing Evidence from a National Evaluation of English Stop Smoking Services. *BioMed*  
49 *Res Int* 2015;1-10.  
50  
51  
52 48. Stoyanov SR, Hides L, Kavanagh DJ, et al. Mobile App Rating Scale: A new tool for  
53 assessing the quality of health mobile apps. *JMIR MHealth and Uhealth* [Internet]  
54 2015;3(1):e27. Available from:  
55 [https://www.ncbi.nlm.nih.gov/pmc/articles/PMC4376132/#\\_\\_ffn\\_\\_sectitle](https://www.ncbi.nlm.nih.gov/pmc/articles/PMC4376132/#__ffn__sectitle) (accessed 10 Mar  
56 2019)  
57  
58  
59  
60

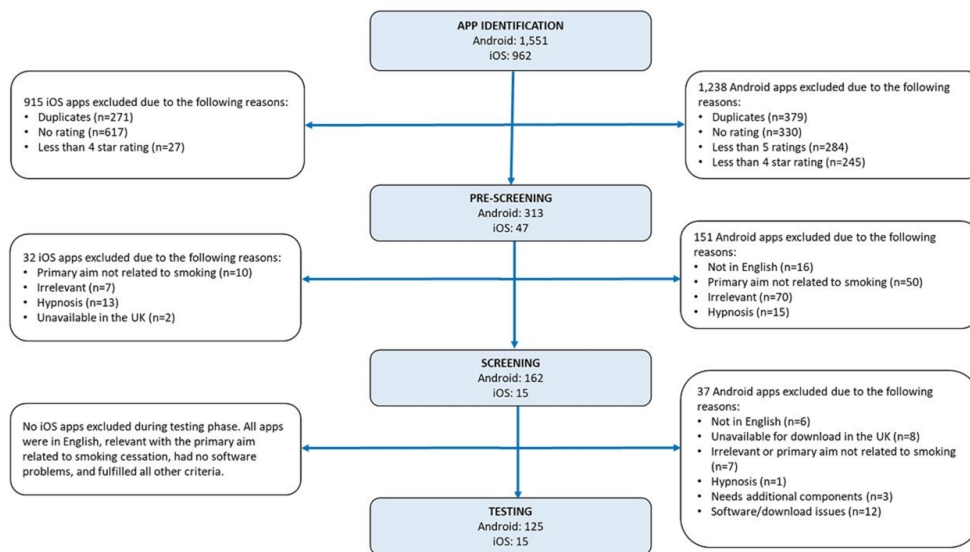

Figure 1. Identification, Screening and Testing Stages

108x60mm (300 x 300 DPI)

#### Gamification Principles

1. Goal setting: Committing to achieve a goal
2. Capacity to overcome challenges: Growth, learning and development
3. Provide feedback on performance: Receiving constant feedback through the experience
4. Reinforcement: Gaining rewards, avoid punishments
5. Compare progress: Monitoring progress with self and others
6. Social connectivity: Interacting with other people
7. Fun and playfulness: Paying out an alternative reality

#### Gamification Tactics

1. Providing clear goals
2. Offering a challenge
3. Using levels or incremental challenges
4. Allocating points
5. Showing progress
6. Providing feedback
7. Giving rewards
8. Providing badges for achievements
9. Showing the game leaders
10. Giving a story or theme

#### Gamification Principles and Tactics Framework

54x41mm (300 x 300 DPI)

## Supplementary Tables

| <b>Five A's Guidelines for Smoking Cessation</b> |                                                                                                                                                                                    |
|--------------------------------------------------|------------------------------------------------------------------------------------------------------------------------------------------------------------------------------------|
| ASK                                              | The mobile app asks the user whether or not they smoke cigarettes and/or use other tobacco products                                                                                |
| ADVISE                                           | The mobile app persuades and advises all tobacco users to quit                                                                                                                     |
| ASSESS                                           | The mobile app assesses the user's readiness to make a quit attempt. For example, the app can do this by asking questions related to importance or quitting and a self-efficacy.   |
| ASSIST                                           | The mobile app assists or helps the user quit. It can do this in various ways: helping create a quit plan, providing counselling, providing support, recommending medications etc. |
| ARRANGE                                          | The mobile app arranges follow-up contact with the user or provides referral to specialist support.                                                                                |

Supplementary table 1. Five A's Guidelines for Smoking Cessation

Supplementary table 2. Adherence to Five A Guidelines for Smoking Cessation

| Smoking Cessation Guidelines |              | Platform      |                    |                 |
|------------------------------|--------------|---------------|--------------------|-----------------|
|                              |              | iOS<br>(n=15) | Android<br>(n=125) | Both<br>(n=140) |
| Five A<br>Guidelines         | ASK          | 12 (80.0%)    | 106 (84.8%)        | 118 (84.3%)     |
|                              | ADVISE       | 9 (60.0%)     | 60 (48.0%)         | 69 (49.3%)      |
|                              | ASSESS       | 3 (20.0%)     | 12 (9.6%)          | 15 (10.7%)      |
|                              | ASSIST       | 6 (40.0%)     | 40 (32.0%)         | 46 (32.9%)      |
|                              | ARRANGE      | 5 (33.3%)     | 9 (7.2%)           | 14 (10.0%)      |
| Level of<br>Adherence        | None (0)     | 0 (0.0%)      | 9 (7.2%)           | 9 (6.4%)        |
|                              | Low (1-2)    | 8 (53.3%)     | 84 (67.2%)         | 92 (65.7%)      |
|                              | Medium (3-4) | 6 (40.0%)     | 30 (24.0%)         | 36 (25.7%)      |
|                              | High (5)     | 1 (6.7%)      | 2 (1.6%)           | 3 (2.1%)        |

Supplementary Table 3. Characteristics of all mobile applications included in the review.

| Name of App                                      | App Developer                    | Platform | Price (Euro) | Rating | No. Of Ratings | Total no. of gamification strategies (out of 7) | Total no. of gamification tactics (out of 9) | Adherence Five As (out of 5) |
|--------------------------------------------------|----------------------------------|----------|--------------|--------|----------------|-------------------------------------------------|----------------------------------------------|------------------------------|
| QuitNow! Quit smoking                            | Fewlaps                          | Android  | 0            | 4.29   | 35045          | 5                                               | 7                                            | 3                            |
| Smoke Free, quit smoking now and stop for good   | The Quit Smoking Specialists     | Android  | 0            | 4.66   | 32875          | 4                                               | 7                                            | 4                            |
| Quit Tracker: Stop Smoking                       | despDev                          | Android  | 0            | 4.59   | 29512          | 4                                               | 7                                            | 2                            |
| Stop Smoking - EasyQuit free                     | Mario Hanna                      | Android  | 0            | 4.80   | 28823          | 5                                               | 6                                            | 4                            |
| Get Rich or Die Smoking                          | Tobias Gruber                    | Android  | 0            | 4.56   | 12363          | 5                                               | 7                                            | 1                            |
| Stop Smoking - quit smoking, be smoke free       | The Quit Smoking Professionals   | Android  | 0            | 4.38   | 6353           | 5                                               | 6                                            | 2                            |
| QuitNow! PRO - Stop smoking                      | Fewlaps                          | Android  | 2.95         | 4.58   | 5718           | 5                                               | 7                                            | 3                            |
| aha!Smokefree                                    | aha!dev                          | Android  | 0            | 4.29   | 3534           | 2                                               | 6                                            | 1                            |
| STOP Cigarettes - Quit smoking                   | academiacea                      | Android  | 0            | 4.11   | 2395           | 4                                               | 6                                            | 4                            |
| Quit Smoking Now: Quit Buddy!                    | HQmedia                          | Android  | 0            | 4.04   | 1296           | 3                                               | 6                                            | 2                            |
| Quit Smoking Tracker GOLD - stop smoking app     | The Quit Smoking Professionals   | Android  | 3.49         | 4.49   | 1080           | 5                                               | 6                                            | 2                            |
| Breathe Now -Stop Smoking Free                   | Peytu                            | Android  | 0            | 4.13   | 976            | 4                                               | 6                                            | 1                            |
| Smoking Log                                      | Cory Charlton                    | Android  | 0            | 4.30   | 724            | 4                                               | 5                                            | 1                            |
| I Give Up Smoking                                | BamyaSoft                        | Android  | 0            | 4.50   | 672            | 4                                               | 6                                            | 2                            |
| Quit smoking                                     | Andeko                           | Android  | 0            | 4.38   | 580            | 3                                               | 5                                            | 3                            |
| Quit Smoking with Stop Tobacco Mobile Trainer    | Iteration Mobile & Vialsoft Apps | Android  | 0            | 4.44   | 463            | 7                                               | 10                                           | 4                            |
| Quit Genius ☹️ Best way to quit smoking for good | Digital Therapeutics             | Android  | 0            | 4.62   | 351            | 7                                               | 8                                            | 5                            |
| Quitify for quit smoking!                        | SpanishApps                      | Android  | 0            | 4.34   | 345            | 6                                               | 6                                            | 4                            |
| Stop Smoking - EasyQuit Pro                      | Mario Hanna                      | Android  | 3.09         | 4.71   | 327            | 5                                               | 6                                            | 4                            |
| Get Rich or Die Smoking Gold                     | Tobias Gruber                    | Android  | 2.44         | 4.49   | 224            | 5                                               | 7                                            | 1                            |



|                                                  |                      |         |      |      |     |   |   |   |
|--------------------------------------------------|----------------------|---------|------|------|-----|---|---|---|
| Quit-Smoking Coach                               | Brainlag Studios     | Android | 1.29 | 4.37 | 167 | 4 | 6 | 3 |
| Quit Smoking                                     | Lydia Games          | Android | 0    | 4.42 | 154 | 3 | 4 | 2 |
| ExSmoker - Stop Smoking Now                      | Antonio Sánchez Díaz | Android | 0    | 4.11 | 133 | 6 | 7 | 1 |
| Kwit - quit smoking for good - smoking cessation | Kwit SAS             | Android | 0    | 4.16 | 126 | 5 | 7 | 1 |
| Quit Smoking                                     | Morisson Software    | Android | 0    | 4.07 | 122 | 2 | 4 | 1 |
| STOPCigarettesPRO Quit Smoking                   | academiacea          | Android | 2.9  | 4.51 | 106 | 4 | 6 | 4 |
| Breathe Now - Stop smoking                       | Peytu                | Android | 1.29 | 4.47 | 75  | 4 | 6 | 1 |
| Reduce and Stop Smoking                          | Limpla               | Android | 0    | 4.17 | 69  | 4 | 6 | 3 |
| QuitGuide - Quit Smoking                         | ICF International    | Android | 0    | 4.15 | 65  | 5 | 6 | 4 |
| Tobacco Kills                                    | liger                | Android | 0    | 4.00 | 61  | 3 | 7 | 1 |
| Quit Smoking - Goodbye Tobacco                   | Your Health          | Android | 0    | 4.39 | 57  | 3 | 6 | 2 |
| Quit smoking                                     | AGI Applications     | Android | 0    | 4.29 | 56  | 3 | 4 | 2 |
| Smoke - quit Pro                                 | NikNormSoft          | Android | 1.69 | 4.87 | 55  | 4 | 6 | 2 |
| Vapertrack                                       | Incoherent Solutions | Android | 0    | 4.39 | 54  | 3 | 6 | 1 |
| Just Quit Smoking Hyperactive                    | Kostyantín Petrov    | Android | 0    | 4.38 | 34  | 5 | 6 | 1 |
| Stop-tobacco                                     | Université de Genève | Android | 0    | 4.74 | 23  | 3 | 6 | 3 |
| Quit Smoking 3D!                                 | UD4M Games           | Android | 0.59 | 4.42 | 19  | 5 | 9 | 2 |
| Quit Smoking Forever                             | pi9soft              | Android | 0    | 4.11 | 18  | 5 | 6 | 2 |
| Quit smoking Pro                                 | Led Scrolling App    | Android | 1.19 | 4.53 | 17  | 3 | 6 | 1 |
| SmokeOut                                         | Asier Murciego       | Android | 0    | 4.29 | 17  | 4 | 9 | 0 |
| Beat Smoking - Quit Smoking                      | Prodocity            | Android | 0    | 4.07 | 14  | 4 | 5 | 4 |
| Quit Smoking Now                                 | SwiftKay Development | Android | 0    | 4.07 | 14  | 4 | 6 | 1 |
| Quit smoking                                     | ZeroZig              | Android | 0.59 | 4.31 | 13  | 5 | 7 | 1 |
| Quit For Treats - Stop Smoking                   | SelaSela             | Android | 0    | 4.36 | 11  | 5 | 5 | 2 |
| Quit Smoking Helper App                          | osthoro              | Android | 0    | 4.44 | 9   | 4 | 6 | 2 |
| Quitty                                           | Playing for Health   | Android | 2.09 | 4.50 | 8   | 4 | 8 | 0 |
| StopSmoking - Quit smoking                       | Optimum Design       | Android | 0    | 4.38 | 8   | 6 | 7 | 0 |
| SimpleQuit: Quit Smoking App                     | Alex Elarbee         | Android | 0    | 4.38 | 8   | 3 | 6 | 1 |

|                                              |                      |         |      |      |      |   |   |   |
|----------------------------------------------|----------------------|---------|------|------|------|---|---|---|
| Quit Smoking smartly - quit smoking app free | Zexa Software        | Android | 0    | 4.43 | 7    | 2 | 3 | 3 |
| ExSmoker - Stop Smoking Now                  | Antonio Sánchez Díaz | Android | 3.49 | 4.17 | 6    | 6 | 7 | 1 |
| Done with Smoking                            | Abdulkarim Alrahili  | Android | 0    | 4.83 | 6    | 3 | 4 | 2 |
| Peer Challenge                               | SliderNet            | Android | 0    | 4.20 | 5    | 7 | 5 | 3 |
| Quit Smoking ! Smoking Kills                 | Groax Technology     | Android | 0    | 5.00 | 5    | 3 | 4 | 3 |
| Give up smoking                              | mochiba              | Android | 0    | 4.40 | 5    | 2 | 3 | 3 |
| IHaveBeenSmokeFreeFor...                     | Anacletus            | Android | 0    | 4.40 | 5    | 3 | 4 | 2 |
| Quit Smoke                                   | Utkarsh Khare        | Android | 0    | 4.80 | 5    | 5 | 6 | 2 |
| Stop smoking helper                          | Roxoft               | Android | 0    | 4.47 | 88   | 4 | 6 | 3 |
| 100 Tips to stop                             | Cap morco studio     | Android | 0    | 4.40 | 89   | 5 | 7 | 1 |
| Stop Smoking B Happy                         | Jeffrey Forte        | Android | 0    | 4.11 | 9    | 4 | 5 | 3 |
| I'm Free                                     | Bellotti Alessandro  | Android | 0    | 4.29 | 7    | 5 | 6 | 1 |
| FitSmoke                                     | D@v Consulting       | Android | 0    | 4.00 | 6    | 5 | 7 | 3 |
| Qwit (Quit Smoking)                          | Team Geny            | Android | 0    | 4.05 | 9217 | 3 | 4 | 2 |
| SmokeFree - quit smoking slowly              | MotiveBite Studio    | Android | 0    | 4.39 | 6724 | 2 | 5 | 2 |
| Quit Smoking: Cessation Nation               | Ron Horner           | Android | 0    | 4.52 | 6383 | 1 | 4 | 1 |
| Time To Quit Smoke                           | VantusMantus         | Android | 0    | 4.25 | 5417 | 1 | 3 | 1 |
| QUIT SMOKING                                 | Mastersoft Ltd       | Android | 0    | 4.36 | 4350 | 2 | 3 | 2 |
| Quit Smoking                                 | HC                   | Android | 0    | 4.73 | 3497 | 2 | 3 | 1 |
| Quit smoking - Smokerstop                    | Titus J. Brinker     | Android | 0    | 4.54 | 3154 | 2 | 5 | 1 |
| No smoking                                   | antonfil84           | Android | 0    | 4.62 | 2722 | 1 | 3 | 2 |
| Qwit Pro LICENSE, Stop Smoking               | Team Geny            | Android | 0.59 | 4.30 | 2247 | 3 | 4 | 2 |
| Cigarette Analytics                          | Alvakos              | Android | 0    | 4.35 | 1324 | 1 | 2 | 2 |
| Smokenote - Quit Smoking                     | NXCARE               | Android | 0    | 4.09 | 748  | 2 | 2 | 1 |
| SmokeLess!                                   | Kroaqs               | Android | 0    | 4.41 | 704  | 2 | 2 | 1 |
| smoke less                                   | David M.             | Android | 0    | 4.32 | 692  | 1 | 2 | 1 |
| Drop It! Quit Smoking                        | Nikola Mladenovic    | Android | 0    | 4.64 | 496  | 2 | 2 | 2 |
| Stop Smoking                                 | Drd                  | Android | 0    | 4.15 | 496  | 3 | 4 | 1 |
| Kick the Habit: Quit Smoking                 | IcySpark             | Android | 0    | 4.00 | 223  | 2 | 2 | 1 |

|    |                                                    |                         |         |      |      |     |   |   |   |
|----|----------------------------------------------------|-------------------------|---------|------|------|-----|---|---|---|
| 1  | myQuitTime - Stop Smoking                          | Arete Appware           | Android | 0    | 4.06 | 218 | 3 | 4 | 1 |
| 2  | Smoke - quit                                       | NikNormSoft             | Android | 0    | 4.62 | 188 | 2 | 2 | 2 |
| 3  | Smokenote Pro - Quit Smoking                       | NXCARE                  | Android | 2.09 | 4.16 | 183 | 2 | 2 | 1 |
| 4  | Quit Smoking -No smoking day                       | PIONE STUDIO            | Android | 0    | 4.15 | 179 | 3 | 2 | 1 |
| 5  | Tracy: Quit smoking!                               | RSTeam Apps             | Android | 0    | 4.53 | 109 | 1 | 2 | 2 |
| 6  | Cigarette Control & Counter                        | vostrop                 | Android | 0.79 | 4.21 | 106 | 2 | 4 | 1 |
| 7  | Smotivator - Quit Smoking                          | Balauris                | Android | 0    | 4.17 | 76  | 2 | 4 | 1 |
| 8  | SOS Challenge                                      | Les Évadés              | Android | 0    | 4.25 | 69  | 1 | 2 | 1 |
| 9  | Quit Smoking Save Life                             | Dubai Games Studio      | Android | 0    | 4.07 | 54  | 1 | 2 | 1 |
| 10 | Puff Away-Stop Smoking Today                       | Hexpress Healthcare Ltd | Android | 0    | 4.26 | 42  | 2 | 2 | 2 |
| 11 | No Smoking - The Game                              | S.O.S. Games            | Android | 0    | 4.47 | 36  | 4 | 4 | 1 |
| 12 | Stop Smoking (Wear support)                        | TedSoft                 | Android | 0    | 4.44 | 34  | 3 | 4 | 2 |
| 13 | Smoke Meter                                        | Kotrots                 | Android | 0    | 4.32 | 28  | 1 | 2 | 1 |
| 14 | Smoke TherApp                                      | Basicks Studio          | Android | 0    | 4.22 | 27  | 3 | 5 | 3 |
| 15 | Smoking Timer (Free)                               | Mogilas                 | Android | 0    | 4.04 | 27  | 1 | 2 | 2 |
| 16 | Quit smoking today!                                | PWR Developers          | Android | 0    | 4.48 | 23  | 3 | 4 | 1 |
| 17 | Quit Smoking, NeverSmoking P                       | SR Mind                 | Android | 8.56 | 4.10 | 21  | 3 | 4 | 3 |
| 18 | Smoking-Counter App                                | Mobile Computing Team   | Android | 0    | 5.00 | 20  | 1 | 2 | 1 |
| 19 | Quit Smoking (Save Health)                         | WRP Solution            | Android | 0    | 4.31 | 16  | 2 | 4 | 1 |
| 20 | Quit Tobacco                                       | Memsta Apps             | Android | 0    | 4.31 | 13  | 3 | 4 | 2 |
| 21 | Left Smoke! free                                   | LumisiAppsAndroid       | Android | 0    | 4.23 | 13  | 2 | 4 | 3 |
| 22 | Good Bye Smoking                                   | Milind Audichya         | Android | 0    | 4.82 | 11  | 3 | 4 | 1 |
| 23 | Quit4GoodLife ( Smoking Cessation - Quit Smoking ) | technology Digest inc   | Android | 0    | 4.18 | 11  | 5 | 4 | 3 |
| 24 | Smokifree :How to quit smoking                     | CZ GAMES                | Android | 0    | 4.60 | 10  | 1 | 2 | 1 |
| 25 | Quit smoking forever - Easy Way App                | studio FX               | Android | 0    | 4.11 | 9   | 2 | 4 | 1 |
| 26 | Quit smoking                                       | Plmn Pn                 | Android | 0    | 4.13 | 8   | 2 | 4 | 1 |
| 27 | Quit Smoking Slowly - Gradually                    | Software Freelancer     | Android | 0    | 5.00 | 8   | 3 | 4 | 2 |
| 28 | Smokestop - Quit Smoking                           | Twenty1Media            | Android | 0    | 4.29 | 7   | 1 | 2 | 3 |

|                                              |                                        |         |      |      |      |   |   |   |
|----------------------------------------------|----------------------------------------|---------|------|------|------|---|---|---|
| Smoking Statistics                           | Vivek.V                                | Android | 0    | 4.50 | 6    | 1 | 2 | 3 |
| Quit smoking: iQuitSmoking App               | SBLMNL                                 | Android | 0    | 4.33 | 6    | 4 | 4 | 1 |
| Stay Quit Coach                              | US Department of Veterans Affairs (VA) | Android | 0    | 4.50 | 6    | 4 | 4 | 4 |
| 20 to Quit Best smoking app                  | Quit smoking                           | Android | 0.59 | 4.00 | 6    | 4 | 4 | 2 |
| Cigarette calculator                         | ShakeJ                                 | Android | 0    | 4.62 | 55   | 1 | 2 | 1 |
| Smokefree 2017                               | Oliver Seibert                         | Android | 0    | 4.41 | 29   | 2 | 4 | 1 |
| Smoke Log                                    | develophamar                           | Android | 0    | 4.42 | 19   | 1 | 2 | 1 |
| DONT SMOKE ! Free Game                       | insprino                               | Android | 0    | 4.20 | 10   | 2 | 5 | 0 |
| Quit Smoking                                 | BlindheartCreations                    | Android | 0    | 4.07 | 46   | 0 | 0 | 0 |
| Stop Smoking with Allen Carr                 | Arcturus Digital Ltd                   | Android | 2.99 | 4.13 | 39   | 3 | 2 | 2 |
| How To Quit Smoking                          | AXON                                   | Android | 0    | 4.29 | 28   | 0 | 0 | 1 |
| Quit Smoking Counter                         | MindSaver.ru                           | Android | 0    | 4.09 | 23   | 0 | 0 | 0 |
| Stop Smoking (How To Guide)                  | Simov                                  | Android | 0    | 4.50 | 18   | 0 | 0 | 1 |
| Quit Smoking                                 | Expert Health Studio                   | Android | 0    | 4.25 | 8    | 0 | 0 | 3 |
| Quit Smoking Helper                          | Parobin Apps                           | Android | 0    | 4.25 | 8    | 0 | 0 | 2 |
| Quit Smoking                                 | VorteX                                 | Android | 0    | 4.00 | 8    | 0 | 0 | 0 |
| Smoker                                       | RealAppsEs                             | Android | 0    | 4.38 | 8    | 1 | 2 | 0 |
| Smoking Cessation - SRIOR                    | MAGNA HEALTH SOLUTIONS                 | Android | 0    | 4.00 | 6    | 0 | 0 | 5 |
| Cigarette Counter                            | BR Consulting                          | Android | 0.6  | 4.00 | 6    | 0 | 0 | 1 |
| SmokingTimer                                 | PSYLEN                                 | Android | 0    | 4.00 | 17   | 0 | 0 | 0 |
| Smoke Free - Quit Smoking Now                | David Crane                            | iOS     | 0    | 4.70 | 6500 | 5 | 6 | 4 |
| LIVESTRONG MyQuit Coach                      | LIVESTRONG.COM                         | iOS     | 0    | 4.50 | 68   | 5 | 5 | 1 |
| My Last Cigarette - Stop Smoking, Stay Quit! | Mastersoft Ltd                         | iOS     | 0.99 | 4.70 | 153  | 1 | 2 | 1 |
| Smokefree                                    | Public Health England                  | iOS     | 0    | 4.50 | 2500 | 5 | 6 | 3 |
| Stoptober                                    | Public Health England                  | iOS     | 0    | 4.40 | 2100 | 5 | 6 | 3 |
| Quit Smoking - My Last Cigarette             | Mastersoft Ltd                         | iOS     | 0    | 4.50 | 323  | 1 | 2 | 1 |
| Quit It Lite - stop smoking today            | digitalsirup GmbH                      | iOS     | 0    | 4.70 | 9    | 3 | 7 | 2 |
| Kwit - Quit smoking cigarettes               | KWIT                                   | iOS     | 0    | 4.60 | 135  | 5 | 8 | 1 |

|                                |                          |     |   |      |     |   |   |   |
|--------------------------------|--------------------------|-----|---|------|-----|---|---|---|
| Quit Genius - quit smoking     | Digital Therapeutics Ltd | iOS | 0 | 4.50 | 120 | 7 | 8 | 5 |
| Quit Smoking Now: Stop Forever | TreePie LLC              | iOS | 0 | 5.00 | 7   | 4 | 6 | 3 |
| The Stop Switch Lite           | Tim smale                | iOS | 0 | 5.00 | 8   | 3 | 4 | 3 |
| Smoke FREE - Non Smoking       | sg-pages                 | iOS | 0 | 4.30 | 223 | 4 | 4 | 1 |
| QuitNow!                       | Fewlaps, S.C             | iOS | 0 | 4.60 | 144 | 6 | 6 | 3 |
| Quit Smoking - Butt Out        | Ellisapps Inc.           | iOS | 0 | 4.30 | 6   | 1 | 2 | 2 |
| Quit Smoking !!!               | Dennis Ebbinghaus        | iOS | 0 | 4.10 | 13  | 1 | 2 | 2 |

For peer review only
