# Supplementary material for: Use of gamification strategies and tactics in mobile applications for smoking cessation: a review of the UK mobile app market
Source: PubMed Central journal article supplement — BMJ Open. 2019 Jun 17;9(6):e027883. doi: 10.1136/bmjopen-2018-027883 (PMC6596969; doi:10.1136/bmjopen-2018-027883), 2019-06-17
Supplement: bmjopen-2018-027883supp001.pdf [file bmjopen-2018-027883supp001.pdf]

## Supplementary Tables

Supplementary table 1. Five A's Guidelines for Smoking Cessation

| <b>Five A's Guidelines for Smoking Cessation</b> |                                                                                                                                                                                    |
|--------------------------------------------------|------------------------------------------------------------------------------------------------------------------------------------------------------------------------------------|
| ASK                                              | The mobile app asks the user whether or not they smoke cigarettes and/or use other tobacco products                                                                                |
| ADVISE                                           | The mobile app persuades and advises all tobacco users to quit                                                                                                                     |
| ASSESS                                           | The mobile app assesses the user's readiness to make a quit attempt. For example, the app can do this by asking questions related to importance or quitting and a self-efficacy.   |
| ASSIST                                           | The mobile app assists or helps the user quit. It can do this in various ways: helping create a quit plan, providing counselling, providing support, recommending medications etc. |
| ARRANGE                                          | The mobile app arranges follow-up contact with the user or provides referral to specialist support.                                                                                |

Supplementary table 2. Adherence to Five A Guidelines for Smoking Cessation

| <b>Smoking Cessation Guidelines</b> |              | <b>Platform</b>       |                            |                         |
|-------------------------------------|--------------|-----------------------|----------------------------|-------------------------|
|                                     |              | <b>iOS<br/>(n=15)</b> | <b>Android<br/>(n=125)</b> | <b>Both<br/>(n=140)</b> |
| <b>Five A<br/>Guidelines</b>        | ASK          | 12 (80.0%)            | 106 (84.8%)                | 118 (84.3%)             |
|                                     | ADVISE       | 9 (60.0%)             | 60 (48.0%)                 | 69 (49.3%)              |
|                                     | ASSESS       | 3 (20.0%)             | 12 (9.6%)                  | 15 (10.7%)              |
|                                     | ASSIST       | 6 (40.0%)             | 40 (32.0%)                 | 46 (32.9%)              |
|                                     | ARRANGE      | 5 (33.3%)             | 9 (7.2%)                   | 14 (10.0%)              |
| <b>Level of<br/>Adherence</b>       | None (0)     | 0 (0.0%)              | 9 (7.2%)                   | 9 (6.4%)                |
|                                     | Low (1-2)    | 8 (53.3%)             | 84 (67.2%)                 | 92 (65.7%)              |
|                                     | Medium (3-4) | 6 (40.0%)             | 30 (24.0%)                 | 36 (25.7%)              |
|                                     | High (5)     | 1 (6.7%)              | 2 (1.6%)                   | 3 (2.1%)                |

Supplementary Table 3. Characteristics of all mobile applications included in the review.

| Name of App                                     | App Developer                    | Platform | Price (Euro) | Rating | No. Of Ratings | Total no. of gamification strategies (out of 7) | Total no. of gamification tactics (out of 9) | Adherence Five As (out of 5) |
|-------------------------------------------------|----------------------------------|----------|--------------|--------|----------------|-------------------------------------------------|----------------------------------------------|------------------------------|
| QuitNow! Quit smoking                           | Fewlaps                          | Android  | 0            | 4.29   | 35045          | 5                                               | 7                                            | 3                            |
| Smoke Free, quit smoking now and stop for good  | The Quit Smoking Specialists     | Android  | 0            | 4.66   | 32875          | 4                                               | 7                                            | 4                            |
| Quit Tracker: Stop Smoking                      | despDev                          | Android  | 0            | 4.59   | 29512          | 4                                               | 7                                            | 2                            |
| Stop Smoking - EasyQuit free                    | Mario Hanna                      | Android  | 0            | 4.80   | 28823          | 5                                               | 6                                            | 4                            |
| Get Rich or Die Smoking                         | Tobias Gruber                    | Android  | 0            | 4.56   | 12363          | 5                                               | 7                                            | 1                            |
| Stop Smoking - quit smoking, be smoke free      | The Quit Smoking Professionals   | Android  | 0            | 4.38   | 6353           | 5                                               | 6                                            | 2                            |
| QuitNow! PRO - Stop smoking                     | Fewlaps                          | Android  | 2.95         | 4.58   | 5718           | 5                                               | 7                                            | 3                            |
| aha!Smokefree                                   | aha!dev                          | Android  | 0            | 4.29   | 3534           | 2                                               | 6                                            | 1                            |
| STOP Cigarettes - Quit smoking                  | academiacea                      | Android  | 0            | 4.11   | 2395           | 4                                               | 6                                            | 4                            |
| Quit Smoking Now: Quit Buddy!                   | HQmedia                          | Android  | 0            | 4.04   | 1296           | 3                                               | 6                                            | 2                            |
| Quit Smoking Tracker GOLD - stop smoking app    | The Quit Smoking Professionals   | Android  | 3.49         | 4.49   | 1080           | 5                                               | 6                                            | 2                            |
| Breathe Now -Stop Smoking Free                  | Peytu                            | Android  | 0            | 4.13   | 976            | 4                                               | 6                                            | 1                            |
| Smoking Log                                     | Cory Charlton                    | Android  | 0            | 4.30   | 724            | 4                                               | 5                                            | 1                            |
| I Give Up Smoking                               | Bamyasoft                        | Android  | 0            | 4.50   | 672            | 4                                               | 6                                            | 2                            |
| Quit smoking                                    | Andeko                           | Android  | 0            | 4.38   | 580            | 3                                               | 5                                            | 3                            |
| Quit Smoking with Stop Tobacco Mobile Trainer   | Iteration Mobile & Vialsoft Apps | Android  | 0            | 4.44   | 463            | 7                                               | 10                                           | 4                            |
| Quit Genius 🧠 Best way to quit smoking for good | Digital Therapeutics             | Android  | 0            | 4.62   | 351            | 7                                               | 8                                            | 5                            |
| Quitify for quit smoking!                       | SpanishApps                      | Android  | 0            | 4.34   | 345            | 6                                               | 6                                            | 4                            |
| Stop Smoking - EasyQuit Pro                     | Mario Hanna                      | Android  | 3.09         | 4.71   | 327            | 5                                               | 6                                            | 4                            |
| Get Rich or Die Smoking Gold                    | Tobias Gruber                    | Android  | 2.44         | 4.49   | 224            | 5                                               | 7                                            | 1                            |

|                                                  |                      |         |      |      |     |   |   |   |
|--------------------------------------------------|----------------------|---------|------|------|-----|---|---|---|
| Quit-Smoking Coach                               | Brainlag Studios     | Android | 1.29 | 4.37 | 167 | 4 | 6 | 3 |
| Quit Smoking                                     | Lydia Games          | Android | 0    | 4.42 | 154 | 3 | 4 | 2 |
| ExSmoker - Stop Smoking Now                      | Antonio Sánchez Díaz | Android | 0    | 4.11 | 133 | 6 | 7 | 1 |
| Kwit - quit smoking for good - smoking cessation | Kwit SAS             | Android | 0    | 4.16 | 126 | 5 | 7 | 1 |
| Quit Smoking                                     | Morisson Software    | Android | 0    | 4.07 | 122 | 2 | 4 | 1 |
| STOPCigarettesPRO Quit Smoking                   | academiacea          | Android | 2.9  | 4.51 | 106 | 4 | 6 | 4 |
| Breathe Now - Stop smoking                       | Peytu                | Android | 1.29 | 4.47 | 75  | 4 | 6 | 1 |
| Reduce and Stop Smoking                          | Limpla               | Android | 0    | 4.17 | 69  | 4 | 6 | 3 |
| QuitGuide - Quit Smoking                         | ICF International    | Android | 0    | 4.15 | 65  | 5 | 6 | 4 |
| Tobacco Kills                                    | liger                | Android | 0    | 4.00 | 61  | 3 | 7 | 1 |
| Quit Smoking - Goodbye Tobacco                   | Your Health          | Android | 0    | 4.39 | 57  | 3 | 6 | 2 |
| Quit smoking                                     | AGI Applications     | Android | 0    | 4.29 | 56  | 3 | 4 | 2 |
| Smoke - quit Pro                                 | NikNormSoft          | Android | 1.69 | 4.87 | 55  | 4 | 6 | 2 |
| Vapertrack                                       | Incoherent Solutions | Android | 0    | 4.39 | 54  | 3 | 6 | 1 |
| Just Quit Smoking Hyperactive                    | Kostyantín Petrov    | Android | 0    | 4.38 | 34  | 5 | 6 | 1 |
| Stop-tobacco                                     | Université de Genève | Android | 0    | 4.74 | 23  | 3 | 6 | 3 |
| Quit Smoking 3D!                                 | UD4M Games           | Android | 0.59 | 4.42 | 19  | 5 | 9 | 2 |
| Quit Smoking Forever                             | pi9soft              | Android | 0    | 4.11 | 18  | 5 | 6 | 2 |
| Quit smoking Pro                                 | Led Scrolling App    | Android | 1.19 | 4.53 | 17  | 3 | 6 | 1 |
| SmokeOut                                         | Asier Murciego       | Android | 0    | 4.29 | 17  | 4 | 9 | 0 |
| Beat Smoking - Quit Smoking                      | Prodocity            | Android | 0    | 4.07 | 14  | 4 | 5 | 4 |
| Quit Smoking Now                                 | SwiftKay Development | Android | 0    | 4.07 | 14  | 4 | 6 | 1 |
| Quit smoking                                     | ZeroZig              | Android | 0.59 | 4.31 | 13  | 5 | 7 | 1 |
| Quit For Treats - Stop Smoking                   | SelaSela             | Android | 0    | 4.36 | 11  | 5 | 5 | 2 |
| Quit Smoking Helper App                          | osthoro              | Android | 0    | 4.44 | 9   | 4 | 6 | 2 |
| Quitty                                           | Playing for Health   | Android | 2.09 | 4.50 | 8   | 4 | 8 | 0 |
| StopSmoking - Quit smoking                       | Optimum Design       | Android | 0    | 4.38 | 8   | 6 | 7 | 0 |
| SimpleQuit: Quit Smoking App                     | Alex Elarbee         | Android | 0    | 4.38 | 8   | 3 | 6 | 1 |

|                                              |                      |         |      |      |      |   |   |   |
|----------------------------------------------|----------------------|---------|------|------|------|---|---|---|
| Quit Smoking smartly - quit smoking app free | Zexa Software        | Android | 0    | 4.43 | 7    | 2 | 3 | 3 |
| ExSmoker - Stop Smoking Now                  | Antonio Sánchez Díaz | Android | 3.49 | 4.17 | 6    | 6 | 7 | 1 |
| Done with Smoking                            | Abdulkarim Alrahili  | Android | 0    | 4.83 | 6    | 3 | 4 | 2 |
| Peer Challenge                               | SliderNet            | Android | 0    | 4.20 | 5    | 7 | 5 | 3 |
| Quit Smoking ! Smoking Kills                 | Groax Technology     | Android | 0    | 5.00 | 5    | 3 | 4 | 3 |
| Give up smoking                              | mochiba              | Android | 0    | 4.40 | 5    | 2 | 3 | 3 |
| IHaveBeenSmokeFreeFor...                     | Anacletus            | Android | 0    | 4.40 | 5    | 3 | 4 | 2 |
| Quit Smoke                                   | Utkarsh Khare        | Android | 0    | 4.80 | 5    | 5 | 6 | 2 |
| Stop smoking helper                          | Roxoft               | Android | 0    | 4.47 | 88   | 4 | 6 | 3 |
| 100 Tips to stop                             | Cap morco studio     | Android | 0    | 4.40 | 89   | 5 | 7 | 1 |
| Stop Smoking B Happy                         | Jeffrey Forte        | Android | 0    | 4.11 | 9    | 4 | 5 | 3 |
| I'm Free                                     | Bellotti Alessandro  | Android | 0    | 4.29 | 7    | 5 | 6 | 1 |
| FitSmoke                                     | D@v Consulting       | Android | 0    | 4.00 | 6    | 5 | 7 | 3 |
| Qwit (Quit Smoking)                          | Team Geny            | Android | 0    | 4.05 | 9217 | 3 | 4 | 2 |
| SmokeFree - quit smoking slowly              | MotiveBite Studio    | Android | 0    | 4.39 | 6724 | 2 | 5 | 2 |
| Quit Smoking: Cessation Nation               | Ron Horner           | Android | 0    | 4.52 | 6383 | 1 | 4 | 1 |
| Time To Quit Smoke                           | VantusMantus         | Android | 0    | 4.25 | 5417 | 1 | 3 | 1 |
| QUIT SMOKING                                 | Mastersoft Ltd       | Android | 0    | 4.36 | 4350 | 2 | 3 | 2 |
| Quit Smoking                                 | HC                   | Android | 0    | 4.73 | 3497 | 2 | 3 | 1 |
| Quit smoking - Smokerstop                    | Titus J. Brinker     | Android | 0    | 4.54 | 3154 | 2 | 5 | 1 |
| No smoking                                   | antonfil84           | Android | 0    | 4.62 | 2722 | 1 | 3 | 2 |
| Qwit Pro LICENSE, Stop Smoking               | Team Geny            | Android | 0.59 | 4.30 | 2247 | 3 | 4 | 2 |
| Cigarette Analytics                          | Alvakos              | Android | 0    | 4.35 | 1324 | 1 | 2 | 2 |
| Smokenote - Quit Smoking                     | NXCARE               | Android | 0    | 4.09 | 748  | 2 | 2 | 1 |
| SmokeLess!                                   | Kroaqs               | Android | 0    | 4.41 | 704  | 2 | 2 | 1 |
| smoke less                                   | David M.             | Android | 0    | 4.32 | 692  | 1 | 2 | 1 |
| Drop It! Quit Smoking                        | Nikola Mladenovic    | Android | 0    | 4.64 | 496  | 2 | 2 | 2 |
| Stop Smoking                                 | Drd                  | Android | 0    | 4.15 | 496  | 3 | 4 | 1 |
| Kick the Habit: Quit Smoking                 | IcySpark             | Android | 0    | 4.00 | 223  | 2 | 2 | 1 |

|                                                    |                         |         |      |      |     |   |   |   |
|----------------------------------------------------|-------------------------|---------|------|------|-----|---|---|---|
| myQuitTime - Stop Smoking                          | Arete Appware           | Android | 0    | 4.06 | 218 | 3 | 4 | 1 |
| Smoke - quit                                       | NikNormSoft             | Android | 0    | 4.62 | 188 | 2 | 2 | 2 |
| Smokenote Pro - Quit Smoking                       | NXCARE                  | Android | 2.09 | 4.16 | 183 | 2 | 2 | 1 |
| Quit Smoking -No smoking day                       | PIONE STUDIO            | Android | 0    | 4.15 | 179 | 3 | 2 | 1 |
| Tracy: Quit smoking!                               | RSTeam Apps             | Android | 0    | 4.53 | 109 | 1 | 2 | 2 |
| Cigarette Control & Counter                        | vostrop                 | Android | 0.79 | 4.21 | 106 | 2 | 4 | 1 |
| Smotivator - Quit Smoking                          | Balauris                | Android | 0    | 4.17 | 76  | 2 | 4 | 1 |
| SOS Challenge                                      | Les Évadés              | Android | 0    | 4.25 | 69  | 1 | 2 | 1 |
| Quit Smoking Save Life                             | Dubai Games Studio      | Android | 0    | 4.07 | 54  | 1 | 2 | 1 |
| Puff Away-Stop Smoking Today                       | Hexpress Healthcare Ltd | Android | 0    | 4.26 | 42  | 2 | 2 | 2 |
| No Smoking - The Game                              | S.O.S. Games            | Android | 0    | 4.47 | 36  | 4 | 4 | 1 |
| Stop Smoking (Wear support)                        | TedSoft                 | Android | 0    | 4.44 | 34  | 3 | 4 | 2 |
| Smoke Meter                                        | Kotrots                 | Android | 0    | 4.32 | 28  | 1 | 2 | 1 |
| Smoke TherApp                                      | Basicks Studio          | Android | 0    | 4.22 | 27  | 3 | 5 | 3 |
| Smoking Timer (Free)                               | Mogilas                 | Android | 0    | 4.04 | 27  | 1 | 2 | 2 |
| Quit smoking today!                                | PWR Developers          | Android | 0    | 4.48 | 23  | 3 | 4 | 1 |
| Quit Smoking, NeverSmoking P                       | SR Mind                 | Android | 8.56 | 4.10 | 21  | 3 | 4 | 3 |
| Smoking-Counter App                                | Mobile Computing Team   | Android | 0    | 5.00 | 20  | 1 | 2 | 1 |
| Quit Smoking (Save Health)                         | WRP Solution            | Android | 0    | 4.31 | 16  | 2 | 4 | 1 |
| Quit Tobacco                                       | Memsta Apps             | Android | 0    | 4.31 | 13  | 3 | 4 | 2 |
| Left Smoke! free                                   | LumisiAppsAndroid       | Android | 0    | 4.23 | 13  | 2 | 4 | 3 |
| Good Bye Smoking                                   | Milind Audichya         | Android | 0    | 4.82 | 11  | 3 | 4 | 1 |
| Quit4GoodLife ( Smoking Cessation - Quit Smoking ) | technology Digest inc   | Android | 0    | 4.18 | 11  | 5 | 4 | 3 |
| Smokifree :How to quit smoking                     | CZ GAMES                | Android | 0    | 4.60 | 10  | 1 | 2 | 1 |
| Quit smoking forever - Easy Way App                | studio FX               | Android | 0    | 4.11 | 9   | 2 | 4 | 1 |
| Quit smoking                                       | Plmn Pn                 | Android | 0    | 4.13 | 8   | 2 | 4 | 1 |
| Quit Smoking Slowly - Gradually                    | Software Freelancer     | Android | 0    | 5.00 | 8   | 3 | 4 | 2 |
| Smokestop - Quit Smoking                           | Twenty1Media            | Android | 0    | 4.29 | 7   | 1 | 2 | 3 |

|                                              |                                        |         |      |      |      |   |   |   |
|----------------------------------------------|----------------------------------------|---------|------|------|------|---|---|---|
| Smoking Statistics                           | Vivek.V                                | Android | 0    | 4.50 | 6    | 1 | 2 | 3 |
| Quit smoking: iQuitSmoking App               | SBLMNL                                 | Android | 0    | 4.33 | 6    | 4 | 4 | 1 |
| Stay Quit Coach                              | US Department of Veterans Affairs (VA) | Android | 0    | 4.50 | 6    | 4 | 4 | 4 |
| 20 to Quit Best smoking app                  | Quit smoking                           | Android | 0.59 | 4.00 | 6    | 4 | 4 | 2 |
| Cigarette calculator                         | ShakeJ                                 | Android | 0    | 4.62 | 55   | 1 | 2 | 1 |
| Smokefree 2017                               | Oliver Seibert                         | Android | 0    | 4.41 | 29   | 2 | 4 | 1 |
| Smoke Log                                    | develophamar                           | Android | 0    | 4.42 | 19   | 1 | 2 | 1 |
| DONT SMOKE ! Free Game                       | insprino                               | Android | 0    | 4.20 | 10   | 2 | 5 | 0 |
| Quit Smoking                                 | BlindheartCreations                    | Android | 0    | 4.07 | 46   | 0 | 0 | 0 |
| Stop Smoking with Allen Carr                 | Arcturus Digital Ltd                   | Android | 2.99 | 4.13 | 39   | 3 | 2 | 2 |
| How To Quit Smoking                          | AXON                                   | Android | 0    | 4.29 | 28   | 0 | 0 | 1 |
| Quit Smoking Counter                         | MindSaver.ru                           | Android | 0    | 4.09 | 23   | 0 | 0 | 0 |
| Stop Smoking (How To Guide)                  | Simov                                  | Android | 0    | 4.50 | 18   | 0 | 0 | 1 |
| Quit Smoking                                 | Expert Health Studio                   | Android | 0    | 4.25 | 8    | 0 | 0 | 3 |
| Quit Smoking Helper                          | Parobin Apps                           | Android | 0    | 4.25 | 8    | 0 | 0 | 2 |
| Quit Smoking                                 | VorteX                                 | Android | 0    | 4.00 | 8    | 0 | 0 | 0 |
| Smoker                                       | RealAppsEs                             | Android | 0    | 4.38 | 8    | 1 | 2 | 0 |
| Smoking Cessation - SRIOR                    | MAGNA HEALTH SOLUTIONS                 | Android | 0    | 4.00 | 6    | 0 | 0 | 5 |
| Cigarette Counter                            | BR Consulting                          | Android | 0.6  | 4.00 | 6    | 0 | 0 | 1 |
| SmokingTimer                                 | PSYLEN                                 | Android | 0    | 4.00 | 17   | 0 | 0 | 0 |
| Smoke Free - Quit Smoking Now                | David Crane                            | iOS     | 0    | 4.70 | 6500 | 5 | 6 | 4 |
| LIVESTRONG MyQuit Coach                      | LIVESTRONG.COM                         | iOS     | 0    | 4.50 | 68   | 5 | 5 | 1 |
| My Last Cigarette - Stop Smoking, Stay Quit! | Mastersoft Ltd                         | iOS     | 0.99 | 4.70 | 153  | 1 | 2 | 1 |
| Smokefree                                    | Public Health England                  | iOS     | 0    | 4.50 | 2500 | 5 | 6 | 3 |
| Stoptober                                    | Public Health England                  | iOS     | 0    | 4.40 | 2100 | 5 | 6 | 3 |
| Quit Smoking - My Last Cigarette             | Mastersoft Ltd                         | iOS     | 0    | 4.50 | 323  | 1 | 2 | 1 |
| Quit It Lite - stop smoking today            | digitalsirup GmbH                      | iOS     | 0    | 4.70 | 9    | 3 | 7 | 2 |
| Kwit - Quit smoking cigarettes               | KWIT                                   | iOS     | 0    | 4.60 | 135  | 5 | 8 | 1 |

|                                |                          |     |   |      |     |   |   |   |
|--------------------------------|--------------------------|-----|---|------|-----|---|---|---|
| Quit Genius - quit smoking     | Digital Therapeutics Ltd | iOS | 0 | 4.50 | 120 | 7 | 8 | 5 |
| Quit Smoking Now: Stop Forever | TreePie LLC              | iOS | 0 | 5.00 | 7   | 4 | 6 | 3 |
| The Stop Switch Lite           | Tim smale                | iOS | 0 | 5.00 | 8   | 3 | 4 | 3 |
| Smoke FREE - Non Smoking       | sg-pages                 | iOS | 0 | 4.30 | 223 | 4 | 4 | 1 |
| QuitNow!                       | Fewlaps, S.C             | iOS | 0 | 4.60 | 144 | 6 | 6 | 3 |
| Quit Smoking - Butt Out        | Ellisapps Inc.           | iOS | 0 | 4.30 | 6   | 1 | 2 | 2 |
| Quit Smoking !!!               | Dennis Ebbinghaus        | iOS | 0 | 4.10 | 13  | 1 | 2 | 2 |
